# Supplementary material for: Combining multiple acquisition modes and computational data annotation for structural characterization in traditional Chinese medicine: Miao Nationality medicine Qijiao Shengbai Capsule as a case study
Source: Royal Society of Chemistry journal article supplement (doi:10.1039/d2ra04720a), 2022-01-01
Supplement: d2ra04720a5.pdf [file d2ra04720a5.pdf]

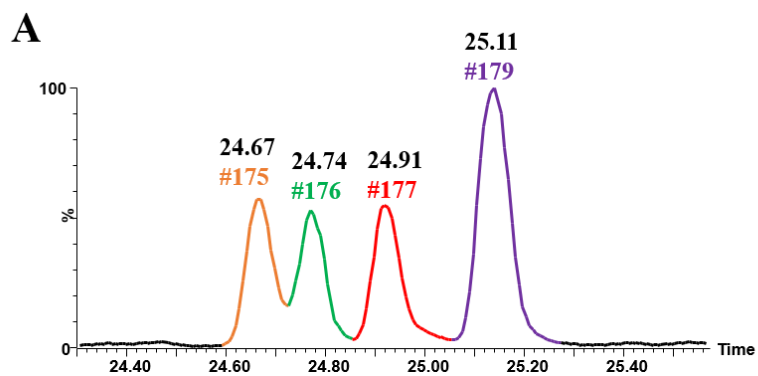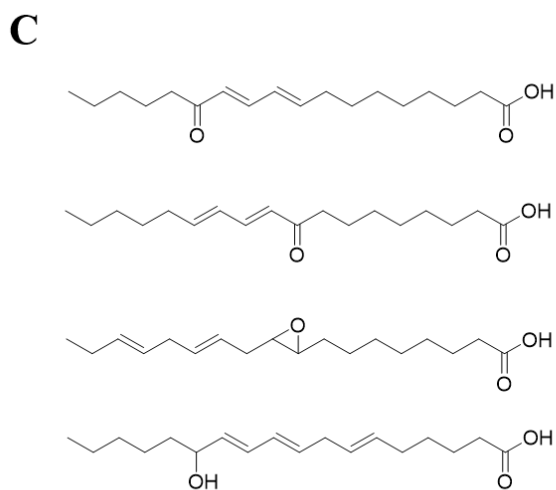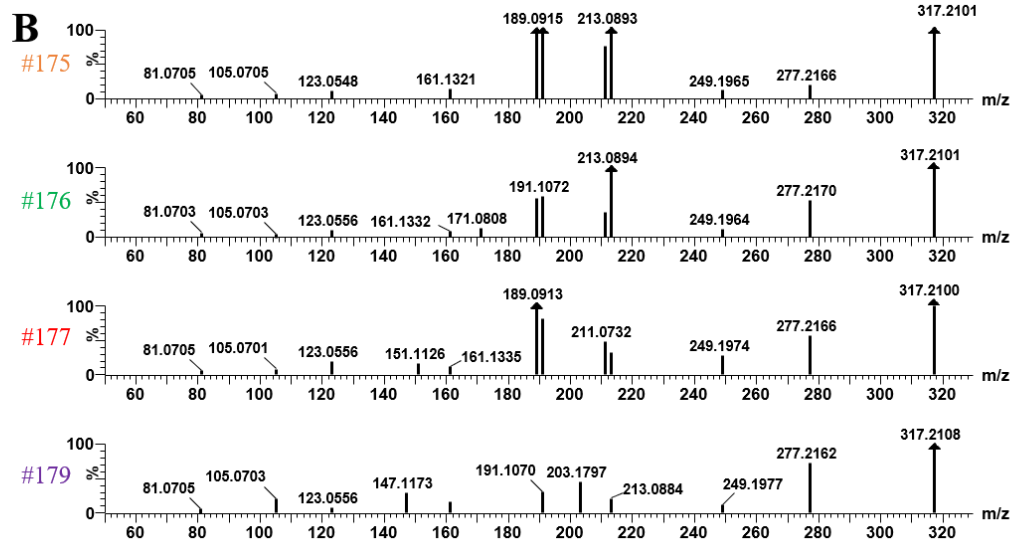

**D**

| NO.  | RT (min) | $m/z$    | Adducts | Drift (ms) | Measured CCS ( $\text{\AA}^2$ ) | Compound                                   | ALLCCS ( $\text{\AA}^2$ ) | Relative error |
|------|----------|----------|---------|------------|---------------------------------|--------------------------------------------|---------------------------|----------------|
| #175 | 24.67    | 317.2343 | +Na     | 2.90       | 188.08                          | 13-oxo-9E,11E-octadecatrienoic acid        | 188.2512                  | -0.09%         |
| #176 | 24.74    | 317.2349 | +Na     | 2.98       | 189.96                          | 9-oxo-10E,12E-octadecatrienoic acid        | 189.6804                  | 0.15%          |
| #177 | 24.91    | 317.2341 | +Na     | 3.12       | 193.77                          | 9(10)-epoxy-12Z,15Z-octadecadienoic acid   | 190.4587                  | 1.74%          |
| #179 | 25.11    | 317.2326 | +Na     | 3.31       | 198.31                          | 13-hydroxy-6Z,9Z,11E-octadecatrienoic acid | 198.7080                  | -0.20%         |
