# Supplementary material for: Combining multiple acquisition modes and computational data annotation for structural characterization in traditional Chinese medicine: Miao Nationality medicine Qijiao Shengbai Capsule as a case study
Source: Royal Society of Chemistry journal article supplement (doi:10.1039/d2ra04720a), 2022-01-01
Supplement: d2ra04720a7.pdf [file d2ra04720a7.pdf]

## Supporting information

### Combining multiple acquisition modes and computational data annotation for structural characterization in traditional Chinese medicine: Miao Nationality medicine Qijiao Shengbai Capsule as a case study

Chi Ma,<sup>a</sup> Yuhao Zhang<sup>c</sup>, Xiuxiu Dou,<sup>a</sup> Li Liu,<sup>d</sup> Weidong Zhang<sup>\*abc</sup> and Ji Ye<sup>\*b</sup>

#### Affiliation

<sup>a</sup> Institute of Interdisciplinary Integrative Medicine Research, Shanghai University of Traditional Chinese Medicine, Shanghai, 201203, China. E-mail: wdzhangy@hotmail.com; Tel: +86 021 81871244.

<sup>b</sup> School of Pharmacy, Naval Medical University, Shanghai 200433, China. E-mail: catheline620@163.com; Tel: +86 021 81871248.

<sup>c</sup> School of Traditional Chinese Pharmacy, China Pharmaceutical University, Nanjing, 211198, China.

<sup>d</sup> Guizhou Hanfang Pharmaceutical Co., Ltd., Guizhou, 550014, China.

## Figure Caption

**Fig. S1.** Molecular networks from QSC in positive (A) and negative (B) ion modes. Nodes with different colors represent various single herbs in the formula (blue was IS; green was AM; orange was ZJ; yellow was EB; gray was EA, ZJ or SF and red was formula).

**Fig. S2.** MS<sup>E</sup> spectra and fragmentation pathway of icariin in QSC under positive ion mode. (A) MS/MS spectra of #82 with parent ion at  $m/z$  1375.4617 [2M+Na]<sup>+</sup>, (B) proposed fragmentation pathway of icariin.

**Fig. S3.** MS<sup>E</sup> spectra and proposed fragmentation pathway of matrine in QSC under positive ion mode. (A) MS/MS spectra of #19 with parent ion at  $m/z$  249.1965 [M+H]<sup>+</sup>, (B) proposed fragmentation pathway of matrine.

**Fig. S4** Characterization of isomers with  $m/z$  317.2343 and CCS prediction based on ALLCCS : (A) four peaks in extracted ion chromatography (EIC) of  $m/z$  317.2343 [M+Na]<sup>+</sup>, (B) MS/MS spectra of four peaks (peak 175, 176, 177 and 179), (C) chemical structures of 13-oxo-9E,11E-octadecatrienoic acid, 9-oxo-10E,12E-octadecatrienoic acid, 9(10)-epoxy-12Z,15Z-octadecadienoic acid and 13-hydroxy-6Z,9Z,11E-octadecatrienoic acid, (D) the retention time, measured molecular weight, adducts, drift time, measured experimental CCS values and their predicted CCS values from ALLCCS platform of three compounds. Relative error represents the accuracy between measured experimental CCS values and predicted CCS values.

**Fig. S5** MS/MS spectra of (A) riligustilide, (B) angelicide and (C) the other 17 isomers with precursor  $m/z$  403.1885.

**Fig. S1**

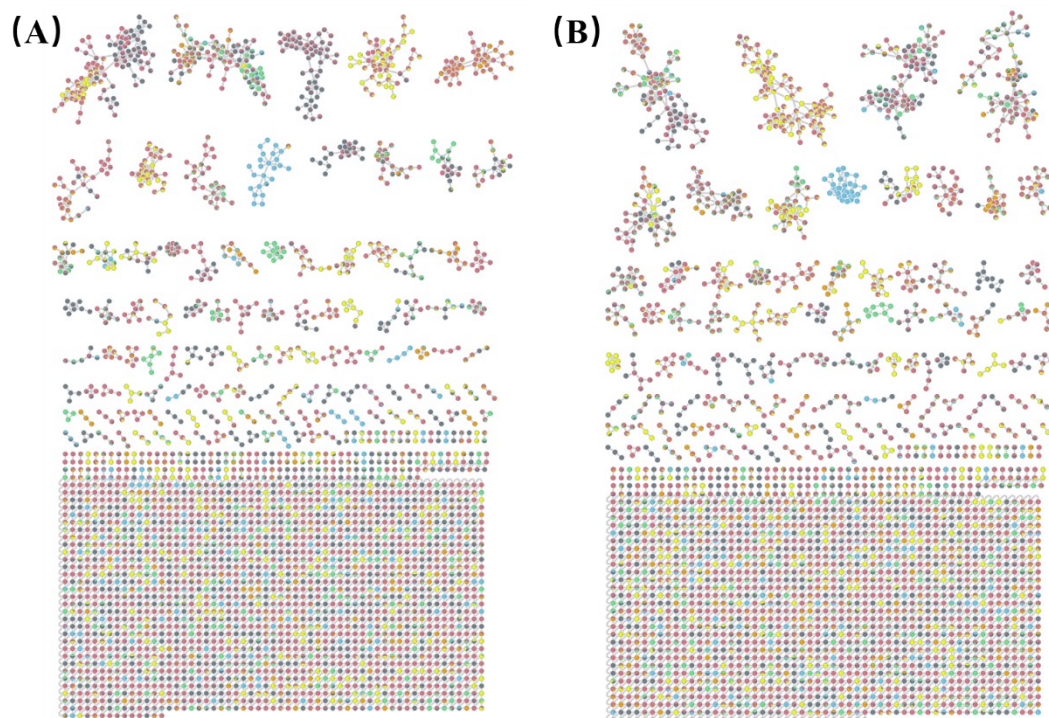

**Fig. S2**

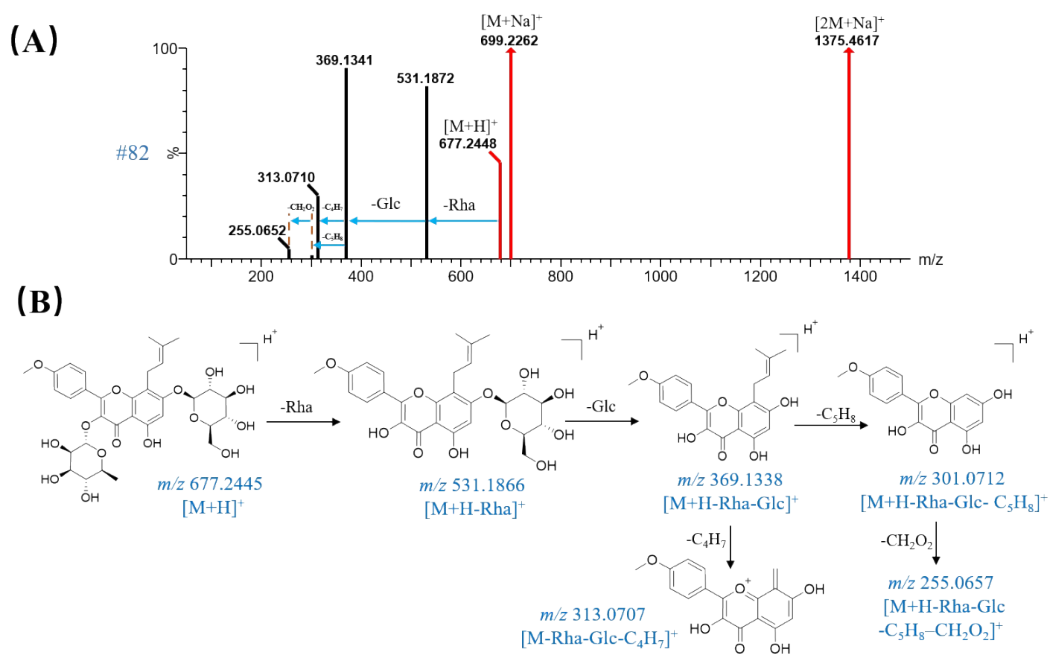

**Fig. S3**

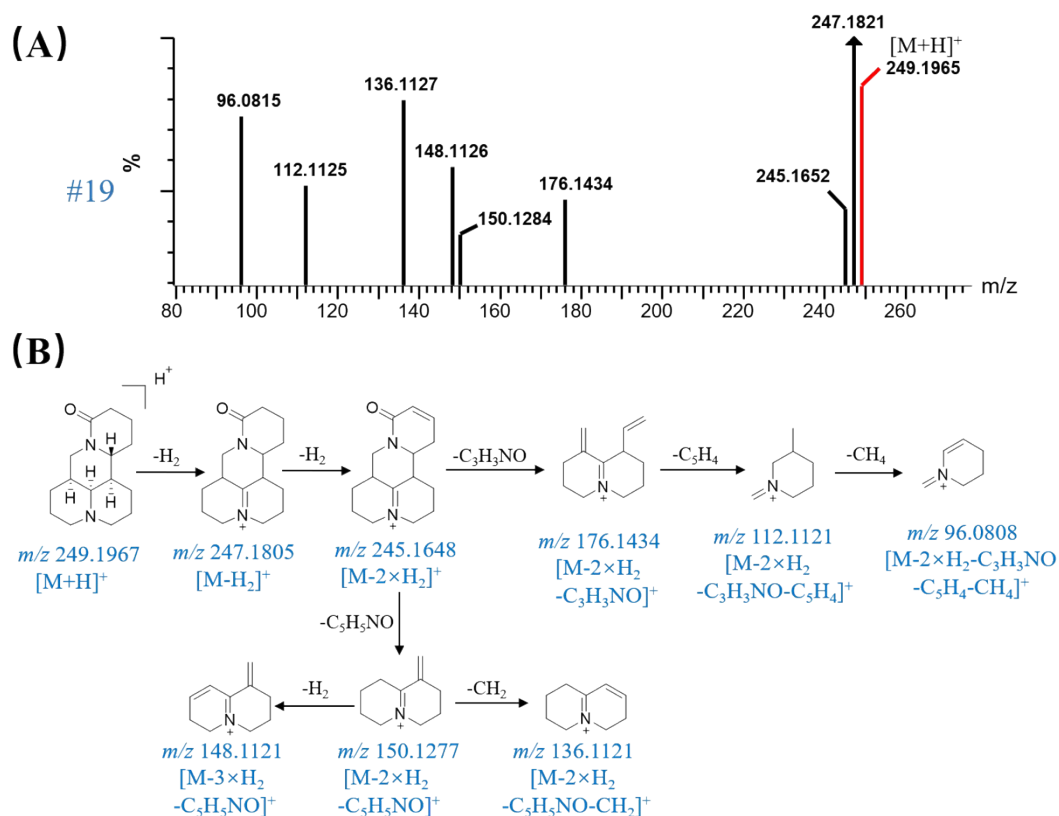

**Fig. S4**

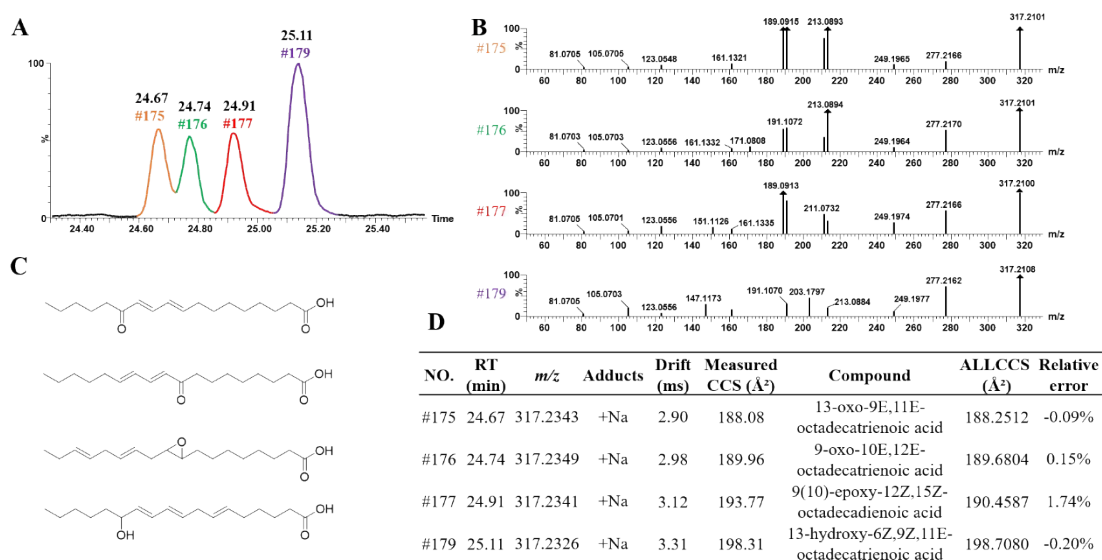

**Fig. S5**

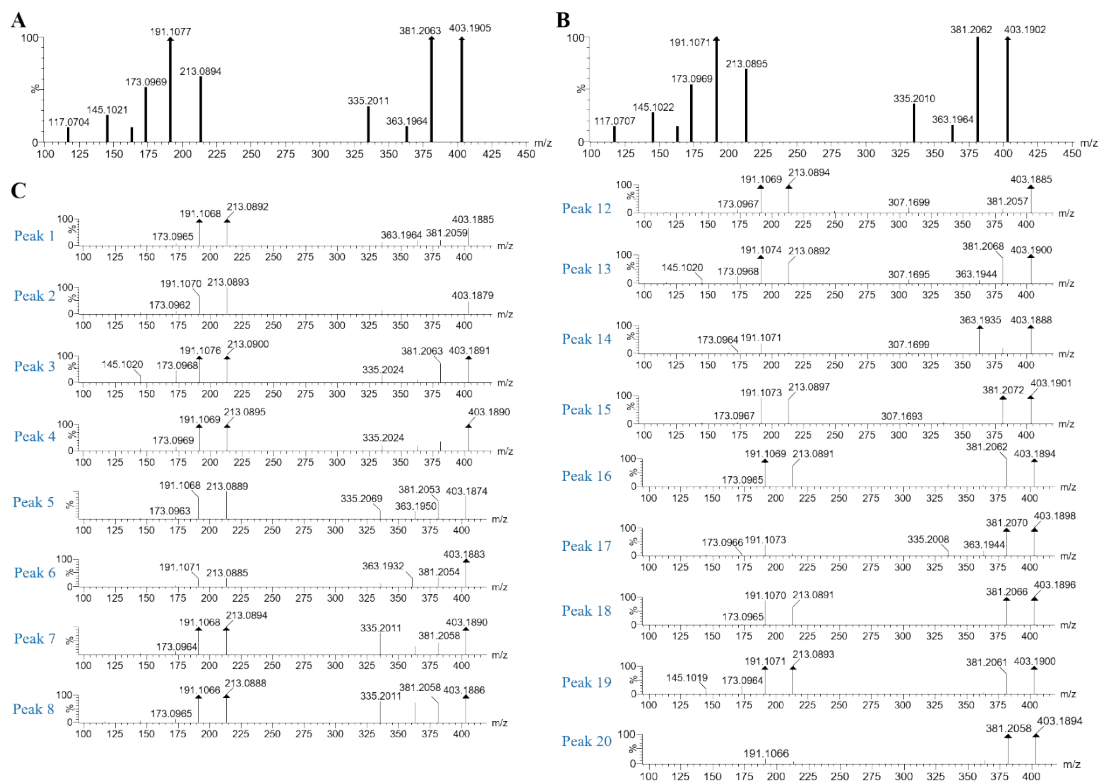

**Tabel. S1 The identification of 202 compounds in QSC sample by using UHPLC-TWIMS-QTOF/MS**

| NO. | RT (min) | Formula                                                       | Positive mode |              |             |                                                                                               | Negative mode |              |             |                             | Origin    | Identitfcation     | Type          |
|-----|----------|---------------------------------------------------------------|---------------|--------------|-------------|-----------------------------------------------------------------------------------------------|---------------|--------------|-------------|-----------------------------|-----------|--------------------|---------------|
|     |          |                                                               | Adducts       | Observed m/z | Error (ppm) | MS <sup>n</sup>                                                                               | Adducts       | Observed m/z | Error (ppm) | MS <sup>n</sup>             |           |                    |               |
| 1   | 1.32     | C <sub>7</sub> H <sub>12</sub> O <sub>6</sub>                 | -             | -            | -           | -                                                                                             | -H            | 191.0558     | 1.05        | 133.0146,115.0029, 87.0088  | AM/EB     | Quinic acid isomer | Organic acids |
| 2*  | 1.40     | C <sub>5</sub> H <sub>9</sub> NO <sub>3</sub>                 | -             | -            | -           | -                                                                                             | -H            | 130.0505     | 0.77        | 128.0346,112.0400, 84.0446  | EA        | L-Hydroxyproline   | Amino acids   |
| 3*  | 1.45     | C <sub>5</sub> H <sub>9</sub> NO <sub>2</sub>                 | -             | -            | -           | -                                                                                             | -H            | 114.0555     | 0.00        | 101.0236,71.0128,6 1.9870   | EB/EA     | L-Proline          | Amino acids   |
| 4*  | 1.50     | C <sub>15</sub> H <sub>24</sub> N <sub>2</sub> O              | +H            | 249.1968     | 0.40        | 232.1561,218.1410, 176.0506,152.1382, 150.1285,148.1136, 136.1136,112.0773 247.1926,245.1722, | -             | -            | -           | -                           | SF        | Sophoridine        | Alkaloids     |
| 5*  | 1.53     | C <sub>15</sub> H <sub>24</sub> N <sub>2</sub> O <sub>2</sub> | +H            | 265.1916     | 0.00        | 205.1397,148.1139, 136.1132,112.0772                                                          | -             | -            | -           | -                           | SF        | Ammothamine        | Alkaloids     |
| 6   | 1.75     | C <sub>6</sub> H <sub>12</sub> O <sub>7</sub>                 | -             | -            | -           | -                                                                                             | -H            | 195.0508     | 1.54        | 161.0456,129.0189, 111.0096 | AM/AS     | Galactonic acid    | Organic acids |
| 7*  | 1.77     | C <sub>7</sub> H <sub>12</sub> O <sub>6</sub>                 | -             | -            | -           | -                                                                                             | -H            | 191.0552     | -2.09       | 161.0441,133.0115, 111.0089 | IS        | Quinic acid        | Organic acids |
| 8   | 1.94     | C <sub>4</sub> H <sub>6</sub> O <sub>5</sub>                  | -             | -            | -           | -                                                                                             | -H            | 133.0137     | 0.00        | 115.0030,111.0082, 71.0125  | ZJ        | Malic acid         | Organic acids |
| 9   | 2.00     | C <sub>6</sub> H <sub>8</sub> O <sub>7</sub>                  | -             | -            | -           | -                                                                                             | -H            | 191.0194     | 1.05        | 173.0086,128.0347, 111.0085 | AM/AS/I S | Citric acid        | Organic acids |
| 10* | 2.04     | C <sub>6</sub> H <sub>13</sub> NO <sub>2</sub>                | -             | -            | -           | -                                                                                             | -H            | 130.0865     | -2.31       | 128.0350,117.0189,          | AM/AS/    | Leucine            | Amino acids   |

| NO. | RT<br>(min) | Formula                                                       | Positive mode |                 |                |                                                                                    | Negative mode |                 |                |                                         | Origin   | Identitfcation | Type                                 |                  |
|-----|-------------|---------------------------------------------------------------|---------------|-----------------|----------------|------------------------------------------------------------------------------------|---------------|-----------------|----------------|-----------------------------------------|----------|----------------|--------------------------------------|------------------|
|     |             |                                                               | Add<br>ucts   | Observed<br>m/z | Error<br>(ppm) | MS <sup>n</sup>                                                                    | Adducts       | Observed<br>m/z | Error<br>(ppm) | MS <sup>n</sup>                         |          |                |                                      |                  |
|     |             |                                                               |               |                 |                |                                                                                    |               |                 |                |                                         | 111.0089 | EB             |                                      |                  |
| 11  | 2.05        | C <sub>15</sub> H <sub>24</sub> N <sub>2</sub> O <sub>2</sub> | +H            | 265.1918        | 0.75           | 205.1351,150.1284,<br>148.1126,136.1124,<br>112.0766                               | -             | -               | -              | -                                       | -        | SF             | 12α-<br>hydroxymatrine               | Alkaloids        |
| 12  | 2.34        | C <sub>13</sub> H <sub>16</sub> O <sub>9</sub>                | -             | -               | -              | -                                                                                  | -H            | 315.0725        | 2.86           | 271.0461,153.0671,<br>135.0444,101.0603 | -        | EB             | Protocatechuic acid<br>-3-O- glucose | Organic<br>acids |
| 13  | 2.50        | C <sub>15</sub> H <sub>22</sub> N <sub>2</sub> O              | +H            | 247.1819        | 3.64           | 150.1286,148.1129,<br>112.0758,84.0796                                             | -             | -               | -              | -                                       | -        | SF             | 5,6-<br>dehydrolupanine              | Alkaloids        |
| 14  | 2.68        | -                                                             | -             | -               | -              | -                                                                                  | -             | 255.0583        | -              | 193.0500,191.0555,<br>165.0556          | -        | SF             | Unknown                              | Unknown          |
| 15  | 3.18        | C <sub>11</sub> H <sub>12</sub> O <sub>7</sub>                | -             | -               | -              | -                                                                                  | -H            | 255.0507        | 0.78           | 239.0561,175.0608,<br>153.0193,109.0289 | -        | SF             | Piscidic acid or<br>isomer           | Organic<br>acids |
| 16* | 3.24        | C <sub>7</sub> H <sub>6</sub> O <sub>4</sub>                  | -             | -               | -              | -                                                                                  | -H            | 153.0193        | 3.27           | 137.0239,109.0289,<br>85.0644,75.0070   | -        | IS/EB          | Gentisic acid                        | Organic<br>acids |
| 17* | 3.40        | C <sub>7</sub> H <sub>6</sub> O <sub>4</sub>                  | -             | -               | -              | -                                                                                  | -H            | 153.0194        | 3.92           | 137.0247,109.0290,<br>85.0648,75.0086   | -        | IS             | Protocatechuic acid                  | Organic<br>acids |
| 18  | 3.50        | C <sub>11</sub> H <sub>12</sub> O <sub>7</sub>                | -             | -               | -              | -                                                                                  | -H            | 255.0510        | 1.96           | 239.0560,175.0611,<br>153.0193,109.0288 | -        | SF             | Piscidic acid or<br>isomer           | Organic<br>acids |
| 19* | 3.60        | C <sub>15</sub> H <sub>24</sub> N <sub>2</sub> O              | +H            | 249.1965        | -0.80          | 247.1821,245.1652,<br>176.1434,150.1284,<br>148.1126,136.1127,<br>112.1125,96.0815 | -             | -               | -              | -                                       | -        | SF             | Matrine                              | Alkaloids        |
| 20  | 3.99        | C <sub>15</sub> H <sub>24</sub> N <sub>2</sub> O <sub>2</sub> | +H            | 265.1914        | -0.75          | 150.0928,136.1136,                                                                 | -             | -               | -              | -                                       | -        | SF             | 14β-                                 | Alkaloids        |

| NO. | RT<br>(min) | Formula                                         | Positive mode |                 |                |                                                   | Negative mode |                 |                |                                                             | Origin | Identitfcation                   | Type             |
|-----|-------------|-------------------------------------------------|---------------|-----------------|----------------|---------------------------------------------------|---------------|-----------------|----------------|-------------------------------------------------------------|--------|----------------------------------|------------------|
|     |             |                                                 | Add<br>ucts   | Observed<br>m/z | Error<br>(ppm) | MS <sup>n</sup>                                   | Adducts       | Observed<br>m/z | Error<br>(ppm) | MS <sup>n</sup>                                             |        |                                  |                  |
| 21  | 4.45        | C <sub>19</sub> H <sub>28</sub> O <sub>11</sub> | +Na           | 455.1542        | 2.86           | 111.0451<br>265.1891,107.0584,<br>91.0544,70.0635 | -H            | 431.1547        | -1.39          | 255.0611,239.0561,<br>153.0189                              | EB     | Zizybeoside I                    | Flavonoids       |
| 22* | 4.72        | C <sub>16</sub> H <sub>18</sub> O <sub>9</sub>  | -             | -               | -              | -                                                 | -H            | 353.0869        | -1.13          | 307.0872,191.0557,<br>129.0555,115.0762                     | EB     | Chlorogenic acid                 | Organic<br>acids |
| 23  | 4.82        | C <sub>18</sub> H <sub>26</sub> O <sub>10</sub> | -             | -               | -              | -                                                 | +HCOO         | 447.1503        | 0.00           | 269.0715,123.0448,<br>71.0125                               | EB     | Icariside F2                     | Flavonoids       |
| 24  | 5.48        | C <sub>16</sub> H <sub>16</sub> O <sub>6</sub>  | +H            | 305.1028        | 0.98           | 265.1913,218.0830,<br>111.0449                    | -             | -               | -              | -                                                           | AS     | Oxypeucedanin<br>hydrate         | Others           |
| 25  | 5.73        | C <sub>10</sub> H <sub>10</sub> O <sub>4</sub>  | -             | -               | -              | -                                                 | -H            | 193.0510        | 4.66           | 179.0351,149.0606,<br>135.0444                              | SF     | Ferulic Acid isomer              | Organic<br>acids |
| 26* | 6.44        | C <sub>20</sub> H <sub>24</sub> NO <sub>4</sub> | -e            | 342.1692        | -3.80          | 297.1126,265.0860,<br>237.0899,222.0663           | -             | -               | -              | -                                                           | EB     | Magnoflorine                     | Alkaloids        |
| 27  | 6.60        | C <sub>19</sub> H <sub>28</sub> O <sub>11</sub> | -             | -               | -              | -                                                 | -H            | 431.1552        | -0.23          | 341.1168,287.0669,<br>137.0248,121.0297,<br>94.0298,71.0139 | ZJ     | Zizybeoside I isomer             | Flavonoids       |
| 28  | 7.23        | C <sub>16</sub> H <sub>18</sub> O <sub>8</sub>  | -             | -               | -              | -                                                 | -H            | 337.0926        | 0.89           | 191.0559,167.0352,<br>123.0466                              | AS     | 5-p-<br>Coumaroylquinic aci<br>d | Organic<br>acids |
| 29  | 7.31        | C <sub>18</sub> H <sub>26</sub> O <sub>10</sub> | +Na           | 425.1415        | -2.12          | 261.1592,187.1205,<br>111.0430,70.0760            | -H            | 401.1444        | -1.00          | 387.1638,269.0999,<br>161.0467,71.0136                      | EB/AS  | Icariside F2                     | Flavonoids       |
| 30  | 7.37        | C <sub>21</sub> H <sub>20</sub> O <sub>9</sub>  | -             | -               | -              | -                                                 | -H            | 415.1028        | -0.24          | 267.0658,223.0614,<br>163.0400,137.0247                     | SF     | 5,7,4'-<br>trihydroxyflavone-    | Flavonoids       |



| NO. | RT<br>(min) | Formula                                         | Positive mode |                 |                |                                                              | Negative mode |                 |                |                                                                            | Origin | Identifcation                                                                                 | Type             |
|-----|-------------|-------------------------------------------------|---------------|-----------------|----------------|--------------------------------------------------------------|---------------|-----------------|----------------|----------------------------------------------------------------------------|--------|-----------------------------------------------------------------------------------------------|------------------|
|     |             |                                                 | Adducts       | Observed<br>m/z | Error<br>(ppm) | MS <sup>n</sup>                                              | Adducts       | Observed<br>m/z | Error<br>(ppm) | MS <sup>n</sup>                                                            |        |                                                                                               |                  |
| 31  | 7.49        | C <sub>27</sub> H <sub>30</sub> O <sub>15</sub> | -             | -               | -              | -                                                            | -H            | 593.1499        | -1.18          | 433.1343,353.0672,<br>223.0606,195.0658,<br>137.0242                       | EB     | 7-O-α-L-rhamaoside<br>kaempferol-3-O-α-<br>L-rhamnopyranosyl<br>(4-1)-β-D-<br>glucopyranoside | Flavonoids       |
| 32  | 8.21        | C <sub>22</sub> H <sub>22</sub> O <sub>11</sub> | +Na           | 485.1050        | -2.06          | 365.2071,301.0712,<br>211.1438,111.0447                      | -H            | 461.1096        | 2.60           | 299.0565,247.1222,<br>161.0249,117.0194                                    | AM     | Swertiajaponin                                                                                | Flavonoids       |
| 33  | 8.30        | C <sub>10</sub> H <sub>18</sub> O <sub>4</sub>  | -             | -               | -              | -                                                            | +HCOO         | 247.1185        | 0.40           | 173.0815,163.0397,<br>119.0501,111.0810                                    | SF     | Sebacic acid                                                                                  | Organic<br>acids |
| 34* | 8.35        | C <sub>9</sub> H <sub>8</sub> O <sub>3</sub>    | +H            | 165.0559        | 4.24           | 136.0684,111.0444,<br>81.0336                                | -H            | 163.0401        | 3.68           | 134.0274,119.0502,<br>111.0811                                             | EB     | P-<br>hydroxycinnamate                                                                        | Organic<br>acids |
| 35  | 8.36        | C <sub>34</sub> H <sub>46</sub> O <sub>18</sub> | +Na           | 765.2589        | 0.91           | 342.1698,285.1286,<br>189.1201,                              | +HCOO         | 787.2648        | -1.65          | 666.3094,417.1692,<br>375.1434,337.0560,<br>247.1181,173.0815,<br>119.0502 | SF     | Eleutheroside E                                                                               | Others           |
| 36  | 8.44        | C <sub>22</sub> H <sub>22</sub> O <sub>7</sub>  | +H            | 399.1438        | -1.50          | 313.1506,265.1912,<br>232.0922,137.0599,<br>111.0447,91.0529 | -             | -               | -              | -                                                                          | EB     | Baohuosu                                                                                      | Flavonoids       |
| 37  | 8.80        | C <sub>28</sub> H <sub>32</sub> O <sub>16</sub> | -             | -               | -              | -                                                            | -H            | 623.1607        | -0.80          | 577.1563,413.1466,<br>283.0612,163.0397,<br>149.0243                       | SF     | Complanatuside                                                                                | Flavonoids       |
| 38  | 9.04        | C <sub>27</sub> H <sub>30</sub> O <sub>14</sub> | -             | -               | -              | -                                                            | -H            | 577.1552        | -0.87          | 461.1949,283.0614,<br>268.0372,175.0977,                                   | SF     | Chrysoeriol-O-<br>pentosylrhamnosid                                                           | Flavonoids       |

| NO. | RT (min) | Formula                                         | Positive mode |              |             |                                                               | Negative mode |              |             |                                                      | Origin | Identitfcation              | Type          |
|-----|----------|-------------------------------------------------|---------------|--------------|-------------|---------------------------------------------------------------|---------------|--------------|-------------|------------------------------------------------------|--------|-----------------------------|---------------|
|     |          |                                                 | Add ucts      | Observed m/z | Error (ppm) | MS <sup>n</sup>                                               | Adducts       | Observed m/z | Error (ppm) | MS <sup>n</sup>                                      |        |                             |               |
| 39* | 9.08     | C <sub>10</sub> H <sub>10</sub> O <sub>4</sub>  | -             | -            | -           | -                                                             | -H            | 193.0504     | 1.55        | 134.0378<br>178.0271,149.0609,<br>134.0370           | AS/AM  | Ferulic Acid                | Organic acids |
| 40  | 9.27     | C <sub>27</sub> H <sub>30</sub> O <sub>16</sub> | -             | -            | -           | -                                                             | -H            | 609.1451     | -0.82       | 463.1339,283.0611,<br>163.0763,135.0446              | ZJ/AS  | Quercetin 3-O-rutinoside    | Flavonoids    |
| 41* | 9.36     | C <sub>22</sub> H <sub>22</sub> O <sub>10</sub> | +H            | 447.1293     | -           | 285.0770,213.0541,<br>111.0446                                | +HCOO         | 491.1190     | 0.00        | 283.0611,269.0448,<br>151.0399,136.0164              | AM     | Calycosin-7-O-β-D-glucoside | Flavonoids    |
| 42  | 9.50     | -                                               | +Na           | 265.1038     | -           | 195.0926,162.0923,<br>120.0816,111.0449                       | -H            | 241.1082     | -           | 197.1185,179.0342,<br>141.0917                       | AS     | Unknown                     | Unknown       |
| 43* | 9.62     | C <sub>27</sub> H <sub>30</sub> O <sub>14</sub> | -             | -            | -           | -                                                             | -H            | 577.1552     | -0.87       | 431.1823,285.0666,<br>245.1013,193.0340,<br>179.0548 | AM     | Kaempferitrin               | Flavonoids    |
| 44* | 9.62     | C <sub>21</sub> H <sub>20</sub> O <sub>12</sub> | +Na           | 487.0841     | -2.26       | 303.0495,287.0519,<br>271.1139,189.0949                       | -H            | 463.0875     | -0.43       | 301.0380,245.1013,<br>193.0505                       | EB     | Hyperoside                  | Flavonoids    |
| 45  | 9.67     | C <sub>26</sub> H <sub>28</sub> O <sub>14</sub> | -             | -            | -           | -                                                             | -H            | 563.1399     | -0.36       | 417.1186,269.0451,<br>245.0928,193.0576              | SF     | Kaempferol-7-O-rha-xyl      | Flavonoids    |
| 46* | 9.71     | C <sub>21</sub> H <sub>20</sub> O <sub>12</sub> | -             | -            | -           | -                                                             | -H            | 463.0867     | -2.16       | 301.0335,271.0287,<br>243.0275,177.0184,<br>161.0275 | EB     | Isoquercitrin               | Flavonoids    |
| 47  | 9.76     | C <sub>25</sub> H <sub>32</sub> O <sub>10</sub> | +Na           | 515.1888     | -0.97       | 443.1675,399.1412,<br>299.1740,249.1124,<br>176.0609,111.0446 | -H            | 491.1916     | -0.20       | 447.0936,359.1552,<br>289.0761,139.0169              | IS     | Schizandriside              | Flavonoids    |
| 48  | 9.80     | C <sub>10</sub> H <sub>10</sub> O <sub>4</sub>  | -             | -            | -           | -                                                             | -H            | 193.0500     | -0.52       | 165.0187,139.0759,                                   | AS     | Dimethyl phthalate          | Others        |

| NO. | RT<br>(min) | Formula                                         | Positive mode |                 |                |                                                                            | Negative mode |                 |                |                                                               | Origin | Identifcation                                                         | Type             |
|-----|-------------|-------------------------------------------------|---------------|-----------------|----------------|----------------------------------------------------------------------------|---------------|-----------------|----------------|---------------------------------------------------------------|--------|-----------------------------------------------------------------------|------------------|
|     |             |                                                 | Add<br>ucts   | Observed<br>m/z | Error<br>(ppm) | MS <sup>n</sup>                                                            | Adducts       | Observed<br>m/z | Error<br>(ppm) | MS <sup>n</sup>                                               |        |                                                                       |                  |
| 49  | 9.93        | C <sub>11</sub> H <sub>11</sub> NO <sub>3</sub> | +H            | 206.0818        | 0.49           | 188.0717,178.0866,<br>160.0766                                             | -H            | 204.0661        | 0.00           | 123.0324<br>186.0557,174.0558,<br>161.0243                    | EB ZJ  | 5-Methoxy-3-<br>indoleaceate                                          | Organic<br>acids |
| 50  | 10.01       | C <sub>9</sub> H <sub>6</sub> O <sub>3</sub>    | -             | -               | -              | -                                                                          | -H            | 161.0246        | 4.35           | 137.0234,133.0352,<br>116.9288                                | SF     | 7-<br>hydroxychromone                                                 | Others           |
| 51  | 10.52       | C <sub>22</sub> H <sub>22</sub> O <sub>10</sub> | +Na           | 469.1108        | -0.64          | 285.0768,178.0867,<br>153.0189,111.0451,<br>81.0337                        | -H            | 445.1137        | 0.45           | 268.0369,239.0334,<br>221.0811,187.0971,<br>179.0351          | AM/SF  | 3'-methoxy-5'-<br>hydroxy-<br>isoflawaone-7-O-β-<br>D-glucopyranoside | Flavonoids       |
| 52  | 10.72       | C <sub>21</sub> H <sub>20</sub> O <sub>11</sub> | -             | -               | -              | -                                                                          | -H            | 447.0932        | 1.12           | 269.0448,187.1005,<br>125.0966                                | EB     | Luteolin-7-O-β-D-<br>glucoside                                        | Flavonoids       |
| 53  | 10.72       | C <sub>38</sub> H <sub>48</sub> O <sub>20</sub> | +Na           | 847.2640        | 0.35           | 825.2822,663.2297,<br>355.1187,299.0556,<br>249.1111                       | -H            | 823.2645        | -1.94          | 661.2119,545.1868,<br>527.1768,353.1012,<br>279.0872,261.0762 | EB     | Rouhuoside                                                            | Flavonoids       |
| 54  | 10.85       | C <sub>19</sub> H <sub>32</sub> O <sub>7</sub>  | +Na           | 395.2043        | -0.76          | 249.1104,148.0764,<br>111.0449                                             | +HCOO         | 417.2116        | -2.16          | 209.0805,179.0350,<br>164.1080,125.0967                       | EB     | Blumel C glucoside                                                    | Others           |
| 55  | 10.95       | C <sub>37</sub> H <sub>46</sub> O <sub>19</sub> | +Na           | 817.2544        | 1.59           | 663.3488,599.2437,<br>517.2646,355.1830,<br>283.1121,225.1025,<br>111.0449 | -H            | 793.2541        | -1.76          | 631.2017,353.1128,<br>281.0453,253.0498,<br>187.0986,1510401  | EB     | Epimedeside E                                                         | Flavonoids       |
| 56  | 11.10       | C <sub>38</sub> H <sub>48</sub> O <sub>19</sub> | +H            | 809.2880        | 1.48           | 663.2299,517.1717,<br>355.1189,299.0557,<br>176.0716,111.0448              | -H            | 807.2708        | -0.50          | 645.2178,463.1242,<br>317.1602,251.0554,<br>179.0338          | EB     | Baohuoside V                                                          | Flavonoids       |

| NO. | RT<br>(min) | Formula                                         | Positive mode |                 |                |                                                               | Negative mode |                 |                |                                                                                                           | Origin             | Identitfcation                             | Type             |
|-----|-------------|-------------------------------------------------|---------------|-----------------|----------------|---------------------------------------------------------------|---------------|-----------------|----------------|-----------------------------------------------------------------------------------------------------------|--------------------|--------------------------------------------|------------------|
|     |             |                                                 | Add<br>ucts   | Observed<br>m/z | Error<br>(ppm) | MS <sup>n</sup>                                               | Adducts       | Observed<br>m/z | Error<br>(ppm) | MS <sup>n</sup>                                                                                           |                    |                                            |                  |
| 57  | 11.12       | C <sub>32</sub> H <sub>38</sub> O <sub>14</sub> | -             | -               | -              | -                                                             | -H            | 645.2175        | -1.24          | 617.2992,513.1549,<br>343.2118,323.0921,<br>311.0600,267.0658,<br>251.0546,217.0494,<br>179.0336,109.0300 | EB                 | Sagittatoside B                            | Flavonoids       |
| 58  | 11.18       | C <sub>27</sub> H <sub>30</sub> O <sub>13</sub> | +Na           | 585.1582        | -0.34          | 563.1749,431.1338,<br>269.0813,197.0954,<br>176.0709,111.0444 | +HCOO         | 607.1671        | 1.32           | 561.1821,267.0758,<br>252.0516,195.0524,<br>179.0344                                                      | SF                 | 3'-methoxy-<br>isoflavone- 7-O-glc-<br>xyl | Flavonoids       |
| 59  | 11.27       | C <sub>9</sub> H <sub>16</sub> O <sub>4</sub>   | -             | -               | -              | -                                                             | -H            | 187.0977        | 3.74           | 144.0458,125.0974,<br>111.0079,97.0651                                                                    | IS/AM/A<br>S/EA/ZJ | Azelaic acid                               | Organic<br>acids |
| 60  | 11.29       | C <sub>32</sub> H <sub>38</sub> O <sub>15</sub> | +H            | 663.2289        | 0.00           | 517.1721,441.2465,<br>355.1190,299.0563,<br>228.1026,111.0456 | -H            | 661.2133        | 0.15           | 515.1540,353.1018,<br>343.2114,323.0947,<br>173.1181                                                      | EB                 | Epimedeside A                              | Flavonoids       |
| 61  | 11.39       | C <sub>27</sub> H <sub>30</sub> O <sub>13</sub> | +Na           | 585.1563        | -3.59          | 563.1771,431.1356,<br>269.0807,192.0667,<br>111.0448          | +HCOO         | 607.1659        | -0.66          | 561.1805,267.0659,<br>237.0771,193.0868                                                                   | SF                 | 3'-methoxy-<br>isoflavone- 7-O-glc-<br>xyl | Flavonoids       |
| 62  | 11.75       | C <sub>21</sub> H <sub>20</sub> O <sub>10</sub> | -             | -               | -              | -                                                             | -H            | 431.0978        | 0.00           | 361.1654,285.0446,<br>243.1235,225.1135                                                                   | EB                 | Kaempferol-3-O-<br>rhamnoside              | Flavonoids       |
| 63  | 11.95       | C <sub>26</sub> H <sub>30</sub> O <sub>14</sub> | +Na           | 589.1523        | -1.70          | 367.2083,255.0635,<br>147.0108,111.0448,<br>85.0271           | -H            | 565.1558        | 0.18           | 433.1126,271.0607,<br>253.0499,227.0706,<br>161.0243,135.0090,<br>91.0192                                 | SF                 | 4'-<br>hydroxyflavanonol-<br>7-O-glu-xyl   | Flavonoids       |
| 64* | 12.10       | C <sub>12</sub> H <sub>16</sub> O <sub>4</sub>  | +Na           | 247.0945        | -0.40          | 207.1026,189.0912,                                            | -H            | 223.0972        | 0.90           | 205.0868,179.0340,                                                                                        | AS                 | Senkyunolide I                             | Phthalides       |

| NO. | RT<br>(min) | Formula                                         | Positive mode |                 |                |                                                                                                           | Negative mode |                 |                |                                                                                                                                 | Origin | Identitfcation  | Type       |
|-----|-------------|-------------------------------------------------|---------------|-----------------|----------------|-----------------------------------------------------------------------------------------------------------|---------------|-----------------|----------------|---------------------------------------------------------------------------------------------------------------------------------|--------|-----------------|------------|
|     |             |                                                 | Add<br>ucts   | Observed<br>m/z | Error<br>(ppm) | MS <sup>n</sup>                                                                                           | Adducts       | Observed<br>m/z | Error<br>(ppm) | MS <sup>n</sup>                                                                                                                 |        |                 |            |
| 65  | 12.13       | C <sub>22</sub> H <sub>22</sub> O <sub>9</sub>  | +Na           | 453.1173        | 2.43           | 161.0971,119.0865<br>431.1329,269.0836,<br>207.1012,161.0971,<br>111.0447,91.0546                         | +HCOO         | 475.1248        | 1.68           | 135.0445<br>267.0664,223.0433,<br>193.0503,135.0445                                                                             | AM/SF  | Ononin          | Flavonoids |
| 66  | 12.28       | C <sub>28</sub> H <sub>32</sub> O <sub>16</sub> | -             | -               | -              | -                                                                                                         | -H            | 623.1616        | 0.64           | 461.2532,299.1854,<br>285.0410,237.0758,<br>221.0807,159.1024,<br>137.0238,116.9282                                             | SF     | Complanatuside  | Flavonoids |
| 67  | 12.28       | C <sub>27</sub> H <sub>32</sub> O <sub>12</sub> | -             | -               | -              | -                                                                                                         | +HCOO         | 593.1877        | 1.18           | 383.1129,299.0927,<br>283.0601,193.0866,<br>137.0241                                                                            | EB     | Maohuoside A    | Flavonoids |
| 68  | 12.40       | -                                               | +Na           | 441.2463        | -              | 383.1508,369.1340,<br>367.2064,285.0770,<br>255.0657,189.0909                                             | +HCOO         | 463.2538        | -              | 417.2486,343.2118,<br>329.1389,283.0604,<br>253.0502,237.0758,<br>193.0863                                                      | EB     | Unknown         | Unknown    |
| 69  | 12.42       | C <sub>39</sub> H <sub>50</sub> O <sub>20</sub> | +Na           | 861.2788        | -0.58          | 839.2982,677.2439,<br>601.1535,531.1879,<br>441.2462,369.1340,<br>313.0718,255.0657,<br>151.0765,111.0445 | +HCOO         | 883.2859        | -1.47          | 837.2803,675.2287,<br>623.1625,517.1704,<br>417.2486,343.2118,<br>329.1389,253.0502,<br>237.0758,191.0559,<br>163.0400,116.9277 | EB     | Epimedin A      | Flavonoids |
| 70  | 12.48       | C <sub>28</sub> H <sub>32</sub> O <sub>15</sub> | +Na           | 631.1643        | 0.63           | 471.2205,441.2459,<br>367.2090,301.0711,                                                                  | -H            | 607.1663        | 0.00           | 493.2337,447.2229,<br>343.2238,237.0770,                                                                                        | AM     | Spinisin isomer | Flavonoids |

| NO. | RT<br>(min) | Formula                                         | Positive mode |                 |                |                                                                                                 | Negative mode |                 |                |                                                                                                  | Origin       | Identitfcation                                          | Type       |
|-----|-------------|-------------------------------------------------|---------------|-----------------|----------------|-------------------------------------------------------------------------------------------------|---------------|-----------------|----------------|--------------------------------------------------------------------------------------------------|--------------|---------------------------------------------------------|------------|
|     |             |                                                 | Add<br>ucts   | Observed<br>m/z | Error<br>(ppm) | MS <sup>n</sup>                                                                                 | Adducts       | Observed<br>m/z | Error<br>(ppm) | MS <sup>n</sup>                                                                                  |              |                                                         |            |
| 71* | 12.65       | C <sub>12</sub> H <sub>16</sub> O <sub>4</sub>  | +Na           | 247.0955        | 3.64           | 255.0656,111.0450<br>207.1016,189.1355,<br>161.0967,111.0445                                    | -H            | 223.0962        | -3.59          | 149.0604<br>205.0864,161.0247,<br>116.9285                                                       | AS           | Senkyunolide H                                          | Phthalides |
| 72* | 12.70       | C <sub>39</sub> H <sub>50</sub> O <sub>20</sub> | +H            | 839.2956        | -2.14          | 677.2496,531.1861,<br>441.2453,369.1342,<br>367.2090,267.1129,<br>207.1004,129.0542,<br>85.0274 | +HCOO         | 883.2887        | 1.70           | 837.2833,675.2276,<br>463.2552,417.2495,<br>345.2276,343.2126,<br>219.0738,205.0934,<br>161.0289 | EB           | Epimedin A                                              | Flavonoids |
| 73  | 12.78       | -                                               | +Na           | 441.2459        | -              | 369.1333,285.0765,<br>267.1129,193.1054                                                         | +HCOO         | 463.2552        | -              | 417.2495,343.2116,<br>283.0615,237.0762,<br>219.0659,193.0860                                    | EB           | Unknown                                                 | Unknown    |
| 74* | 12.89       | C <sub>38</sub> H <sub>48</sub> O <sub>19</sub> | +H            | 809.2852        | -1.98          | 677.2419,531.1864,<br>369.1349,313.0749                                                         | +HCOO         | 853.2756        | -1.17          | 645.2177,507.1501,<br>343.2116,201.1126                                                          | EB           | Epimedin B                                              | Flavonoids |
| 75  | 12.93       | C <sub>23</sub> H <sub>26</sub> O <sub>10</sub> | +H            | 485.1417        | -1.44          | 463.1615,301.1065,<br>167.0698,85.0273                                                          | +HCOO         | 507.1507        | 0.79           | 299.1025,251.0559,<br>193.0504                                                                   | AM           | 9,10-<br>dimethoxypterocar<br>pan-3-O-β-D-<br>glucoside | Flavonoids |
| 76* | 13.02       | C <sub>15</sub> H <sub>10</sub> O <sub>4</sub>  | +H            | 255.0657        | 0.00           | 178.0862,147.0107,<br>111.0452                                                                  | -H            | 253.0507        | 2.37           | 237.0770,203.1285,<br>193.0872,101.0246                                                          | AM/IS/S<br>F | Daidzein                                                | Flavonoids |
| 77* | 13.10       | C <sub>39</sub> H <sub>50</sub> O <sub>19</sub> | +Na           | 845.2823        | -2.48          | 823.3009,677.2435,<br>531.1873,369.1345,<br>313.0716,129.0543,<br>85.0275                       | +HCOO         | 867.2913        | -1.15          | 821.2856,659.2338,<br>366.1113,279.0293,<br>128.0106                                             | EB           | Epmedin C                                               | Flavonoids |

| NO. | RT (min) | Formula                                         | Positive mode |              |             |                                                                            | Negative mode |              |             |                                                                            | Origin   | Identitfcation                                                         | Type       |
|-----|----------|-------------------------------------------------|---------------|--------------|-------------|----------------------------------------------------------------------------|---------------|--------------|-------------|----------------------------------------------------------------------------|----------|------------------------------------------------------------------------|------------|
|     |          |                                                 | Adducts       | Observed m/z | Error (ppm) | MS <sup>n</sup>                                                            | Adducts       | Observed m/z | Error (ppm) | MS <sup>n</sup>                                                            |          |                                                                        |            |
| 78  | 13.23    | C <sub>39</sub> H <sub>50</sub> O <sub>19</sub> | +Na           | 845.2820     | -2.84       | 823.3002,677.2423,<br>487.1574,369.1345,<br>313.0698,167.0694,<br>135.0427 | +HCOO         | 867.2917     | -0.69       | 821.2866,659.2341,<br>463.1607,301.0726,<br>253.0506,149.0243,<br>121.0299 | AM       | Epmedin C isomer                                                       | Flavonoids |
| 79  | 13.28    | C <sub>22</sub> H <sub>22</sub> O <sub>10</sub> | +Na           | 469.1114     | 0.64        | 285.0753,175.0395,<br>151.0382,123.0434                                    | +HCOO         | 491.1199     | 1.83        | 283.0614,235.0605,<br>109.0297,89.0243                                     | SF       | 3'-methoxy-5'-<br>hydroxy-<br>isoflavanone-7-O-β-<br>D-glucopyranoside | Flavonoids |
| 80  | 13.38    | C <sub>16</sub> H <sub>12</sub> O <sub>5</sub>  | +H            | 285.0757     | -2.10       | 257.0795,189.0878,<br>137.0579,81.0323                                     | -H            | 283.0613     | 2.47        | 255.0663,195.0659,<br>119.0505,91.0192                                     | SF/IS    | 3,7-dihydroxy-3'-<br>methoxy-<br>flavanonol                            | Flavonoids |
| 81  | 13.38    | C <sub>22</sub> H <sub>26</sub> O <sub>8</sub>  | +Na           | 441.1522     | -0.68       | 367.2086,323.1275,<br>187.0768,137.0603<br>699.2262,677.2448,              | -H            | 417.1546     | -0.72       | 399.1156,367.1181,<br>195.0661<br>513.1766,409.1289,                       | EB       | Syringaresinol                                                         | Others     |
| 82* | 13.52    | C <sub>33</sub> H <sub>40</sub> O <sub>15</sub> | 2M+<br>Na     | 1375.4617    | -1.09       | 531.1872,369.1341,<br>313.0710,255.0652<br>285.0762,253.0468,              | +HCOO         | 721.2355     | 1.53        | 367.1187,351.0875,<br>128.0103,89.0244                                     | EB       | Icariin                                                                | Flavonoids |
| 83* | 13.77    | C <sub>16</sub> H <sub>12</sub> O <sub>5</sub>  | +Na           | 307.0581     | -0.33       | 225.0550,213.0541,<br>171.0220,162.0146                                    | -H            | 283.0614     | 2.83        | 268.0378,211.0401,<br>147.0813                                             | AM/SF/IS | Calycosin                                                              | Flavonoids |
| 84  | 14.14    | C <sub>17</sub> H <sub>14</sub> O <sub>6</sub>  | +H            | 315.0860     | -2.86       | 285.0757,249.1093,<br>196.1331,111.0447                                    | -H            | 313.0720     | 2.56        | 225.1126,213.1125,<br>169.1230                                             | IS/AM    | 2',4'-dihydroxy-5,6-<br>dimethoxyisoflavao<br>ne                       | Flavonoids |
| 85  | 14.18    | C <sub>17</sub> H <sub>18</sub> O <sub>6</sub>  | -             | -            | -           | -                                                                          | -H            | 317.1019     | -1.89       | 283.0613,268.0368,                                                         | AM       | 5'-hydro-                                                              | Flavonoids |

| NO. | RT<br>(min) | Formula                                         | Positive mode |                 |                |                                                                                     | Negative mode |                 |                |                                                                                                           | Origin | Identitfcation                         | Type                                    |  |                 |  |
|-----|-------------|-------------------------------------------------|---------------|-----------------|----------------|-------------------------------------------------------------------------------------|---------------|-----------------|----------------|-----------------------------------------------------------------------------------------------------------|--------|----------------------------------------|-----------------------------------------|--|-----------------|--|
|     |             |                                                 | Add<br>ucts   | Observed<br>m/z | Error<br>(ppm) | MS <sup>n</sup>                                                                     | Adducts       | Observed<br>m/z | Error<br>(ppm) | MS <sup>n</sup>                                                                                           |        |                                        |                                         |  |                 |  |
|     |             |                                                 |               |                 |                |                                                                                     |               |                 |                |                                                                                                           |        |                                        | 221.0810,177.0195,<br>137.0247,119.0506 |  | isomucronulatol |  |
| 86  | 14.42       | C <sub>26</sub> H <sub>32</sub> O <sub>8</sub>  | +Na           | 495.2003        | 1.62           | 473.2186,455.2077,<br>413.1587,303.1593,<br>285.0757,179.0337,<br>151.0391,123.0437 | -H            | 471.2015        | -0.85          | 411.1448,283.0610,<br>255.0655,177.0197,<br>149.0240,121.0293                                             | SF     | Kushenol K                             | Flavonoids                              |  |                 |  |
| 87  | 14.50       | C <sub>27</sub> H <sub>32</sub> O <sub>11</sub> | +Na           | 555.1829        | -2.34          | 533.2001,387.1442,<br>369.1333,313.0709,<br>279.1952,129.0542                       | -H            | 531.1865        | -0.19          | 385.1261,367.0975,<br>301.0715,213.1122,<br>169.1238                                                      | EB     | Icaritin 3-O-<br>Rhamnoside            | Flavonoids                              |  |                 |  |
| 88  | 14.80       | C <sub>41</sub> H <sub>68</sub> O <sub>14</sub> | +Na           | 807.4497        | -1.24          | 785.4661,351.2143,<br>269.0813,175.0869                                             | +HCOO         | 829.4565        | -2.53          | 783.4518,357.1358,<br>345.2276,327.2163,<br>283.0596,207.3657<br>367.1176,357.1328,<br>353.1013,299.0546, | AM     | Astragaloside IV<br>isomer             | Saponins                                |  |                 |  |
| 89  | 14.89       | C <sub>21</sub> H <sub>22</sub> O <sub>7</sub>  | +H            | 387.1447        | 0.77           | 369.1334,313.0706,<br>285.0742,235.0964,<br>179.0337                                | -H            | 385.1285        | -0.52          | 283.0602,269.0814,<br>255.0610,235.0958,<br>207.1022,177.0189,<br>161.0244,149.0238,<br>121.0287          | SF     | M1(3,2'-di-hydroxy-<br>isoxanthohumol) | Flavonoids                              |  |                 |  |
| 90  | 14.96       | -                                               | +Na           | 427.2673        | -              | 349.1804,273.0746,<br>137.0383                                                      | +HCOO         | 449.3661        | -              | 403.3489,347.0562,<br>271.1158,135.0350                                                                   | IS     | Unknown                                | Unknown                                 |  |                 |  |
| 91  | 15.18       | -                                               | +Na           | 351.2153        | -              | 279.1932,265.0975,<br>247.0869,206.0839                                             | -H            | 327.2169        | -              | 215.1280,197.1175                                                                                         | AM/AS  | Unknown                                | Unknown                                 |  |                 |  |



| NO. | RT<br>(min) | Formula                                         | Positive mode |                 |                |                                                                                                         | Negative mode |                 |                |                                                                                                           | Origin | Identitfcation      | Type       |
|-----|-------------|-------------------------------------------------|---------------|-----------------|----------------|---------------------------------------------------------------------------------------------------------|---------------|-----------------|----------------|-----------------------------------------------------------------------------------------------------------|--------|---------------------|------------|
|     |             |                                                 | Add<br>ucts   | Observed<br>m/z | Error<br>(ppm) | MS <sup>n</sup>                                                                                         | Adducts       | Observed<br>m/z | Error<br>(ppm) | MS <sup>n</sup>                                                                                           |        |                     |            |
| 92  | 15.25       | C <sub>26</sub> H <sub>32</sub> O <sub>7</sub>  | +H            | 457.2227        | 0.22           | 439.2121,421.2006,<br>321.1701,303.1592,<br>179.0336,168.0148<br>663.2280,607.2144,                     | -H            | 455.2077        | 1.54           | 437.1955,385.1275,<br>293.1751,207.1024,<br>161.0245,116.9282                                             | SF     | Kurarinol or isomer | Flavonoids |
| 93  | 15.30       | C <sub>32</sub> H <sub>38</sub> O <sub>15</sub> | +Na           | 685.2094        | -2.04          | 457.2220,355.1183,<br>351.2139,299.0557,<br>265.0973,189.0914<br>265.0975,249.1963,<br>111.0447,91.0526 | -H            | 661.2123        | -1.36          | 455.2064,327.2172,<br>397.0394,207.0653,<br>161.0240                                                      | EB     | Ikariside B isomer  | Flavonoids |
| 94  | 15.50       | C <sub>15</sub> H <sub>10</sub> O <sub>5</sub>  | +H            | 271.0611        | 1.84           | 265.0975,249.1963,<br>111.0447,91.0526                                                                  | -H            | 269.0452        | 0.74           | 221.0810,193.0862,<br>161.0243,116.9276                                                                   | SF     | Baicalein           | Flavonoids |
| 95  | 15.59       | C <sub>26</sub> H <sub>28</sub> O <sub>11</sub> | -             | -               | -              | -                                                                                                       | -H            | 515.1552        | -0.19          | 457.1856,347.0223,<br>269.0541,193.0864<br>429.1902,439.1748,<br>423.1805,399.1417,<br>371.1110,355.1895, | EB     | Epimedeside C       | Flavonoids |
| 96  | 15.64       | C <sub>25</sub> H <sub>30</sub> O <sub>8</sub>  | +Na           | 481.1836        | -0.42          | 501.2566,355.1179,<br>297.0761,235.0965,<br>179.0346<br>647.2338,355.1186,<br>299.0558,235.0976,        | -H            | 457.1863        | 0.22           | 295.1549,279.1599,<br>269.0453,248.9731,<br>177.0181,161.0243,<br>128.0095,116.9276<br>533.1298,363.0175, | SF     | M2                  | Flavonoids |
| 97  | 15.92       | C <sub>31</sub> H <sub>36</sub> O <sub>14</sub> | +Na           | 655.1989        | -2.14          | 297.0761,235.0965,<br>179.0346                                                                          | -H            | 631.2042        | 2.38           | 283.0605,207.1020,<br>161.0245                                                                            | EB     | Ikariside F         | Flavonoids |
| 98  | 15.97       | C <sub>32</sub> H <sub>38</sub> O <sub>14</sub> | +Na           | 669.2157        | -0.30          | 647.2338,355.1186,<br>299.0558,235.0976,                                                                | -H            | 645.2172        | -1.70          | 631.2017,353.0998,<br>329.2361,283.0608,                                                                  | EB     | Sagittatoside B     | Flavonoids |

| NO. | RT<br>(min) | Formula                                        | Positive mode |                 |                |                                                      | Negative mode |                 |                |                                                      | Origin                        | Identitfcation                                                  | Type             |
|-----|-------------|------------------------------------------------|---------------|-----------------|----------------|------------------------------------------------------|---------------|-----------------|----------------|------------------------------------------------------|-------------------------------|-----------------------------------------------------------------|------------------|
|     |             |                                                | Add<br>ucts   | Observed<br>m/z | Error<br>(ppm) | MS <sup>n</sup>                                      | Adducts       | Observed<br>m/z | Error<br>(ppm) | MS <sup>n</sup>                                      |                               |                                                                 |                  |
|     |             |                                                |               |                 |                | 179.0345                                             |               |                 |                | 161.0242                                             |                               |                                                                 |                  |
| 99  | 15.99       | C <sub>18</sub> H <sub>34</sub> O <sub>5</sub> | +Na           | 353.2313        | 2.55           | 299.0563,265.0968,<br>235.0965,179.0344,<br>111.0452 | -H            | 329.2331        | 0.91           | 283.0610,229.1437,<br>161.0241                       | AM/IS/E<br>A/<br>AS/EB/Z<br>J | (Z)-5,8,11-<br>trihydroxyoctadec-<br>8-enoic acid or<br>isomer  | Organic<br>acids |
| 100 | 16.09       | C <sub>18</sub> H <sub>34</sub> O <sub>5</sub> | +Na           | 353.2317        | 3.68           | 299.0553,297.0762,<br>235.0967,179.0344              | -H            | 329.2330        | 0.61           | 283.0604,229.1437,<br>161.0241                       | AM/IS/E<br>A/<br>AS/EB/Z<br>J | (Z)-5,8,11-<br>trihydroxyoctadec-<br>9-enoic acid or<br>isomer  | Organic<br>acids |
| 101 | 16.20       | C <sub>18</sub> H <sub>34</sub> O <sub>5</sub> | +Na           | 353.2318        | 3.96           | 301.0708,277.2161,<br>235.0969,179.0348,<br>111.0446 | -H            | 329.2342        | 4.25           | 299.0554,229.1438,<br>227.1280,177.0914,<br>161.0237 | AM/IS/E<br>A/<br>AS/EB/Z<br>J | (Z)-5,8,11-<br>trihydroxyoctadec-<br>10-enoic acid or<br>isomer | Organic<br>acids |
| 102 | 16.24       | C <sub>18</sub> H <sub>34</sub> O <sub>5</sub> | +Na           | 353.2321        | 4.81           | 297.0771,269.0805,<br>235.0993,179.0346,<br>111.0445 | -H            | 329.2335        | 2.13           | 299.0559,229.1437,<br>227.1281,177.0920,<br>161.0244 | AM/IS/E<br>A/<br>AS/EB/Z<br>J | (Z)-5,8,11-<br>trihydroxyoctadec-<br>11-enoic acid or<br>isomer | Organic<br>acids |
| 103 | 16.25       | C <sub>26</sub> H <sub>32</sub> O <sub>7</sub> | +H            | 457.2217        | -1.97          | 385.1296,369.1346,<br>353.2018,301.0712,<br>179.0345 | -H            | 455.2049        | -4.61          | 371.1141,329.2332,<br>299.0556,161.0246,<br>116.9287 | SF                            | Kurarinol or isomer                                             | Flavonoids       |
| 104 | 16.30       | C <sub>18</sub> H <sub>34</sub> O <sub>5</sub> | +Na           | 353.2310        | 1.70           | 299.0553,297.0762,<br>235.0967,179.0344,<br>111.0452 | -H            | 329.2330        | 0.61           | 299.0548,229.1437,<br>227.1267,177.0917,<br>161.0241 | AM/IS/E<br>A/<br>AS/EB/Z      | (Z)-5,8,11-<br>trihydroxyoctadec-<br>12-enoic acid or           | Organic<br>acids |

| NO.  | RT<br>(min) | Formula                                         | Positive mode |                 |                |                                                                                                          | Negative mode |                 |                |                                                                                                                                              | Origin | Identitfcation               | Type       |
|------|-------------|-------------------------------------------------|---------------|-----------------|----------------|----------------------------------------------------------------------------------------------------------|---------------|-----------------|----------------|----------------------------------------------------------------------------------------------------------------------------------------------|--------|------------------------------|------------|
|      |             |                                                 | Add<br>ucts   | Observed<br>m/z | Error<br>(ppm) | MS <sup>n</sup>                                                                                          | Adducts       | Observed<br>m/z | Error<br>(ppm) | MS <sup>n</sup>                                                                                                                              |        |                              |            |
|      |             |                                                 |               |                 |                |                                                                                                          |               |                 |                |                                                                                                                                              | J      | isomer                       |            |
| 105  | 16.39       | C <sub>26</sub> H <sub>32</sub> O <sub>7</sub>  | +Na           | 479.2043        | -0.63          | 351.2146,331.1884,<br>207.1013,179.0346                                                                  | -H            | 455.2061        | -1.98          | 439.1753,371.1138,<br>329.2330,299.0555,<br>205.0864,177.0915,<br>161.0968                                                                   | SF     | Kurarinol or isomer          | Flavonoids |
| 106* | 16.62       | C <sub>41</sub> H <sub>68</sub> O <sub>14</sub> | +Na           | 807.4495        | -1.49          | 785.4681,605.4042,<br>587.3950,473.3627,<br>437.3411,351.2164,<br>269.0818,245.0489,<br>143.1059,73.0271 | +HCOO         | 829.4578        | -0.96          | 783.4526,369.1356,<br>327.2216,287.1019,<br>207.1024,161.0971                                                                                | AM     | Astragaloside IV             | Saponins   |
| 107  | 16.66       | C <sub>21</sub> H <sub>22</sub> O <sub>6</sub>  | +Na           | 393.1318        | 1.02           | 371.1504,351.2159,<br>325.1440,285.0762,<br>209.0463,179.0331,<br>107.0500                               | -H            | 369.1343        | 1.35           | 351.1230,341.1383,<br>337.1073,325.1429,<br>283.0614,279.1599,<br>219.0655,207.1022,<br>191.0573,177.0194,<br>161.0239,149.0235,<br>116.9289 | SF     | 2-hydroxy-<br>isoxanthohumol | Flavonoids |
| 108* | 16.80       | C <sub>41</sub> H <sub>68</sub> O <sub>14</sub> | +Na           | 807.4502        | -0.62          | 491.2390,455.2230,<br>412.3652,355.1185,<br>299.0630,269.0811,<br>143.1072                               | +HCOO         | 829.4567        | -2.29          | 783.4517,369.1331,<br>353.1016,327.2176,<br>287.2222,213.1491,<br>161.0970                                                                   | AM     | Astragaloside III            | Saponins   |
| 109  | 16.82       | C <sub>26</sub> H <sub>28</sub> O <sub>10</sub> | +H            | 501.1761        | 0.00           | 355.1179,299.0547,<br>269.0805,143.1077                                                                  | -H            | 499.1607        | 0.60           | 353.1019,327.2174,<br>295.0976,227.0349,                                                                                                     | EB     | Baohuoside II                | Flavonoids |

| NO.  | RT<br>(min) | Formula                                         | Positive mode |                 |                |                                                                                                                        | Negative mode |                 |                |                                                               | Origin       | Identitfcation  | Type             |
|------|-------------|-------------------------------------------------|---------------|-----------------|----------------|------------------------------------------------------------------------------------------------------------------------|---------------|-----------------|----------------|---------------------------------------------------------------|--------------|-----------------|------------------|
|      |             |                                                 | Add<br>ucts   | Observed<br>m/z | Error<br>(ppm) | MS <sup>n</sup>                                                                                                        | Adducts       | Observed<br>m/z | Error<br>(ppm) | MS <sup>n</sup>                                               |              |                 |                  |
|      |             |                                                 |               |                 |                |                                                                                                                        |               |                 |                | 171.1029,116.9289                                             |              |                 |                  |
| 110* | 16.99       | C <sub>48</sub> H <sub>78</sub> O <sub>18</sub> | +Na           | 965.5076        | -1.04          | 943.5247,797.4670,<br>635.4163,617.1045,<br>599.3950,459.3831,<br>441.3733,423.3627,<br>221.1906,191.1072,<br>177.0559 | -H            | 941.5115        | 0.53           | 371.1133,327.2180,<br>229.1455,116.9264                       | AM           | Soyasaponin I   | Saponins         |
| 111  | 17.17       | C <sub>27</sub> H <sub>30</sub> O <sub>11</sub> | +Na           | 553.1697        | 1.99           | 455.2255,283.0605,<br>269.1458,161.0306                                                                                | -H            | 529.1709        | -0.19          | 367.1543,339.1597,<br>281.0455,253.0500,<br>229.1443,205.0867 | EB           | Icariside I     | Flavonoids       |
| 112* | 17.54       | C <sub>16</sub> H <sub>12</sub> O <sub>4</sub>  | +H            | 269.0822        | 2.97           | 253.0483,197.0584,<br>154.0222                                                                                         | -H            | 267.0661        | 1.50           | 252.0425,223.0397,<br>195.0452                                | AM/SF/I<br>S | Formononetin    | Flavonoids       |
| 113  | 17.54       | C <sub>18</sub> H <sub>34</sub> O <sub>5</sub>  | +Na           | 353.2312        | 2.26           | 213.0917,207.1094,<br>177.0566,137.0608<br>353.2314,269.0815,                                                          | -H            | 329.2333        | 1.52           | 253.0750,219.0685,<br>116.9296                                | AS           | Pinellice acid  | Organic<br>acids |
| 114  | 17.67       | C <sub>21</sub> H <sub>20</sub> O <sub>6</sub>  | +H            | 369.1341        | 0.81           | 247.0653,191.1071,<br>149.0610<br>369.1337,313.0739,                                                                   | -H            | 367.1179        | -0.82          | 329.2440,267.0746,<br>207.1017,163.1127<br>367.1179,329.2328, | EB           | Icaritin isomer | Flavonoids       |
| 115  | 17.77       | C <sub>33</sub> H <sub>40</sub> O <sub>15</sub> | +Na           | 699.2255        | -1.43          | 309.2068,201.0095,<br>129.0564,85.0297<br>377.1375,355.1563,                                                           | -H            | 675.2276        | -1.93          | 267.0652,207.1017,<br>163.1127<br>353.1398,329.2331,          | EB           | Icariin isomer  | Flavonoids       |
| 116* | 17.77       | C <sub>21</sub> H <sub>22</sub> O <sub>5</sub>  | 2M+<br>Na     | 731.2829        | -0.41          | 269.0810,235.0971,<br>191.1072,179.0348                                                                                | 2M-H          | 707.2850        | -0.85          | 279.1602,233.0816,<br>189.0915                                | SF           | Isoxanthohumol  | Flavonoids       |

| NO.  | RT<br>(min) | Formula                                         | Positive mode |                 |                |                                                                                                           | Negative mode |                 |                |                                                      | Origin | Identitfcation                   | Type       |
|------|-------------|-------------------------------------------------|---------------|-----------------|----------------|-----------------------------------------------------------------------------------------------------------|---------------|-----------------|----------------|------------------------------------------------------|--------|----------------------------------|------------|
|      |             |                                                 | Add<br>ucts   | Observed<br>m/z | Error<br>(ppm) | MS <sup>n</sup>                                                                                           | Adducts       | Observed<br>m/z | Error<br>(ppm) | MS <sup>n</sup>                                      |        |                                  |            |
| 117  | 17.88       | C <sub>26</sub> H <sub>30</sub> O <sub>7</sub>  | +Na           | 477.1902        | 2.72           | 455.2083,437.1967,<br>377.1371,355.1531,<br>175.0610,143.1076<br>827.4788,809.4687,<br>629.4062,455.3529, | -H            | 453.1902        | -2.43          | 439.1756,353.1400,<br>279.1594,161.0247              | SF     | Kushenol N or<br>isomer          | Flavonoids |
| 118  | 18.12       | C <sub>43</sub> H <sub>70</sub> O <sub>15</sub> | +Na           | 849.4612        | 0.00           | 437.3426,419.3314,<br>353.2321,175.0608,<br>143.1073                                                      | +HCOO         | 871.4675        | -1.84          | 825.4612,535.1955,<br>329.2325,219.0652,<br>165.1281 | AM     | Isoastragaloside II<br>or isomer | Saponins   |
| 119  | 18.32       | C <sub>12</sub> H <sub>14</sub> O <sub>3</sub>  | -             | -               | -              | -                                                                                                         | -H            | 205.0872        | 3.41           | 161.0975,145.0300,<br>106.0424                       | AS     | 6,7-Epoxyiligustilide            | Phthalides |
| 120  | 18.44       | C <sub>32</sub> H <sub>38</sub> O <sub>14</sub> | +Na           | 669.2136        | -3.44          | 647.2282,515.1919,<br>369.1333,353.2305,<br>167.0714<br>531.1868,369.1332,                                | -H            | 645.2176        | -1.08          | 367.1305,329.2323,<br>301.1073,205.0862,<br>161.0970 | EB     | Sagittatoside B                  | Flavonoids |
| 121  | 18.51       | C <sub>35</sub> H <sub>58</sub> O <sub>9</sub>  | +Na           | 645.3955        | -3.72          | 353.2292,270.0054,<br>95.0847<br>661.2495,515.1924,                                                       | +HCOO         | 667.4053        | -0.60          | 529.1877,367.1301,<br>329.2433,219.0657              | AM     | Astramembrannin II               | Saponins   |
| 122  | 18.58       | C <sub>33</sub> H <sub>40</sub> O <sub>14</sub> | +Na           | 683.2307        | -1.32          | 369.1333,353.2305,<br>313.0731<br>283.0605,255.0652,                                                      | -H            | 659.2350        | 1.52           | 367.1183,351.0886,<br>329.2323,219.0660,<br>116.9275 | EB     | 2''-O-rhamnosy<br>Icarside II    | Flavonoids |
| 123* | 18.70       | C <sub>16</sub> H <sub>12</sub> O <sub>5</sub>  | +H            | 285.0766        | 1.05           | 175.0394,163.0404,<br>151.0401,147.0451,<br>123.0455                                                      | -H            | 283.0612        | 2.12           | 255.0647,203.0711,<br>145.0291,116.9279              | IS     | Maackiain                        | Flavonoids |

| NO. | RT<br>(min) | Formula                                         | Positive mode |                 |                |                                                                                                  | Negative mode |                 |                |                                                                                                           | Origin | Identitfcation                   | Type       |
|-----|-------------|-------------------------------------------------|---------------|-----------------|----------------|--------------------------------------------------------------------------------------------------|---------------|-----------------|----------------|-----------------------------------------------------------------------------------------------------------|--------|----------------------------------|------------|
|     |             |                                                 | Add<br>ucts   | Observed<br>m/z | Error<br>(ppm) | MS <sup>n</sup>                                                                                  | Adducts       | Observed<br>m/z | Error<br>(ppm) | MS <sup>n</sup>                                                                                           |        |                                  |            |
| 124 | 18.85       | C <sub>33</sub> H <sub>40</sub> O <sub>14</sub> | +Na           | 683.2299        | -2.49          | 661.2491,515.1933,<br>369.1341,353.2303,<br>313.0711                                             | -H            | 659.2344        | 0.61           | 441.1905,329.2332,<br>243.1599,219.0656,<br>116.9274                                                      | EB     | 3''-O-rhamnosy<br>Icarside II    | Flavonoids |
| 125 | 18.91       | C <sub>25</sub> H <sub>30</sub> O <sub>7</sub>  | +H            | 443.2073        | 0.68           | 425.1945,307.1544,<br>301.0715,277.1438,<br>165.0182                                             | -H            | 441.1903        | -2.27          | 423.1800,385.1266,<br>363.0168,279.1599,<br>161.0242,116.9281                                             | SF     | Norkurarinol or<br>isomer        | Flavonoids |
| 126 | 19.00       | C <sub>25</sub> H <sub>30</sub> O <sub>7</sub>  | +H            | 443.2077        | 1.58           | 425.1968,353.2294,<br>307.1540,301.0702,<br>283.0599,165.0177                                    | -H            | 441.1917        | 0.91           | 423.1800,385.1275,<br>369.0991,279.1596,<br>161.0244,116.9287                                             | SF     | Norkurarinol or<br>isomer        | Flavonoids |
| 127 | 19.03       | C <sub>33</sub> H <sub>40</sub> O <sub>14</sub> | +Na           | 683.2314        | -0.29          | 661.2515,515.1927,<br>369.1337,353.2299,<br>313.0716                                             | -H            | 659.2339        | -0.15          | 441.1906,371.1493,<br>329.2325,299.0919,<br>269.0444,219.0657,<br>205.0863,116.9276                       | EB     | 4''-O-rhamnosy<br>Icarside II    | Flavonoids |
| 128 | 19.13       | C <sub>43</sub> H <sub>70</sub> O <sub>15</sub> | +Na           | 849.4602        | -1.18          | 827.4777,809.4655,<br>629.4042,455.3519,<br>437.3418,419.3308,<br>353.2300,175.0610,<br>143.1074 | +HCOO         | 871.4678        | -1.49          | 825.4620,535.1954,<br>329.2328,311.2218,<br>219.0661,116.9278                                             | AM     | Isoastragaloside II<br>or isomer | Saponins   |
| 129 | 19.27       | C <sub>26</sub> H <sub>30</sub> O <sub>7</sub>  | +Na           | 477.1886        | -0.63          | 455.2070,439.1738,<br>369.1339,349.1989,<br>179.0347,119.0863                                    | -H            | 453.1935        | 4.85           | 439.1767,435.1813,<br>425.1970,421.1662,<br>383.1162,303.1607,<br>275.1659,177.0198,<br>149.0246,121.0295 | SF     | Kushenol N                       | Flavonoids |

| NO.  | RT (min) | Formula                                         | Positive mode |              |             |                                                                         | Negative mode |              |             |                                                                | Origin | Identifcation                   | Type       |
|------|----------|-------------------------------------------------|---------------|--------------|-------------|-------------------------------------------------------------------------|---------------|--------------|-------------|----------------------------------------------------------------|--------|---------------------------------|------------|
|      |          |                                                 | Adducts       | Observed m/z | Error (ppm) | MS <sup>n</sup>                                                         | Adducts       | Observed m/z | Error (ppm) | MS <sup>n</sup>                                                |        |                                 |            |
| 130* | 19.38    | C <sub>16</sub> H <sub>14</sub> O <sub>4</sub>  | +H            | 271.0976     | 2.21        | 161.0607,137.0636,123.0446                                              | -H            | 269.0816     | 0.74        | 254.0614,239.0349,225.0549,211.0396,116.9278                   | IS     | Medicarpin                      | Flavonoids |
| 131  | 19.41    | C <sub>12</sub> H <sub>12</sub> O <sub>3</sub>  | +H            | 205.0866     | 0.49        | 187.0762,169.0658,159.0813,137.0608,123.0536,91.0553                    | -H            | 203.0714     | 2.95        | 173.0238,145.0288,132.0211,116.9281                            | AS     | 3-Butylidene-4-hydroxyphthalide | Phthalides |
| 132  | 19.82    | C <sub>43</sub> H <sub>70</sub> O <sub>15</sub> | +Na           | 849.4615     | 0.35        | 827.4786,809.4685,629.4057,455.3529,437.3423,419.3315,247.1521,175.0595 | +HCOO         | 871.4682     | -1.03       | 825.4625,533.1818,327.2166,311.2216,219.0670,116.9284          | AM     | Isoastragaloside II or isomer   | Saponins   |
| 133* | 19.86    | C <sub>27</sub> H <sub>30</sub> O <sub>10</sub> | 2M+Na         | 1051.3555    | -2.00       | 537.1731,515.1898,369.1333,313.0701,249.1960,213.0887,129.0561,85.0275  | 2M-H          | 1027.3601    | 0.10        | 513.1766,367.1171,351.0871,323.0918,279.0298,251.0350,116.9280 | EB     | Baohuoside I                    | Flavonoids |
| 134  | 19.98    | C <sub>21</sub> H <sub>20</sub> O <sub>7</sub>  | +H            | 385.1274     | -3.38       | 369.1337,313.0712,191.1070,177.0535,123.0545                            | -H            | 383.1121     | -2.61       | 331.2471,287.2227,203.0698,116.9273                            | EB     | 2'-hydroxy-β-anhydroicaritin    | Saponins   |
| 135  | 20.00    | C <sub>20</sub> H <sub>20</sub> O <sub>6</sub>  | +H            | 357.1333     | -1.40       | 335.2199,297.0767,191.1071,179.0345                                     | -H            | 355.1184     | 0.56        | 309.2070,255.0661,248.9724,161.0237,116.9287                   | SF     | Leachianone G                   | Flavonoids |
| 136  | 20.10    | C <sub>26</sub> H <sub>30</sub> O <sub>6</sub>  | 2M+Na         | 899.3977     | -0.56       | 461.1963,439.2119,421.2003,303.1700,297.0767,179.0334,                  | 2M-H          | 875.3997     | -1.14       | 437.1969,383.1129,275.1653,217.0862,161.0249,137.0246,         | SF     | Kurarinone or isomer            | Flavonoids |

| NO.  | RT<br>(min) | Formula                                         | Positive mode |                 |                |                                                                            | Negative mode |                 |                |                                                               | Origin | Identitfcation                      | Type       |
|------|-------------|-------------------------------------------------|---------------|-----------------|----------------|----------------------------------------------------------------------------|---------------|-----------------|----------------|---------------------------------------------------------------|--------|-------------------------------------|------------|
|      |             |                                                 | Add<br>ucts   | Observed<br>m/z | Error<br>(ppm) | MS <sup>n</sup>                                                            | Adducts       | Observed<br>m/z | Error<br>(ppm) | MS <sup>n</sup>                                               |        |                                     |            |
| 137  | 20.24       | C <sub>12</sub> H <sub>12</sub> O <sub>3</sub>  | -             | -               | -              | 151.0383                                                                   | -H            | 203.0731        | 0.00           | 116.9287<br>174.0323,161.0240,<br>159.0816,116.9282           | AS     | 3-Butylidene-4-<br>hydroxyphthalide | Phthalides |
| 138  | 20.42       | C <sub>26</sub> H <sub>32</sub> O <sub>7</sub>  | +Na           | 479.2045        | -0.21          | 457.2234,439.2118,<br>423.1425,351.2142,<br>333.2035,297.0770,<br>179.0348 | -H            | 455.2067        | -0.66          | 437.1958,309.2067,<br>283.0606,241.1805,<br>161.0245,116.9281 | SF     | Kurarinol or isomer                 | Flavonoids |
| 139  | 20.51       | C <sub>25</sub> H <sub>28</sub> O <sub>7</sub>  | +H            | 441.1918        | 1.13           | 409.2553,367.1181,<br>179.0343,165.0187                                    | -H            | 439.1763        | 1.37           | 421.1654,395.1850,<br>261.1513,177.0194,<br>161.0237,116.9278 | SF     | Kushenol L                          | Flavonoids |
| 140  | 20.59       | C <sub>20</sub> H <sub>20</sub> O <sub>5</sub>  | +H            | 341.1400        | 3.22           | 303.1600,285.0766,<br>179.0355,165.0187                                    | -H            | 339.1231        | -0.29          | 257.1652,219.0664,<br>161.0248,116.9289                       | SF     | Desmethylxanthohu<br>mol            | Flavonoids |
| 141* | 20.73       | C <sub>45</sub> H <sub>72</sub> O <sub>16</sub> | +Na           | 891.4702        | -1.79          | 861.4083,671.4153,<br>437.1948,419.1853,<br>335.2196,217.0708,<br>143.1073 | +HCOO         | 913.4799        | 0.22           | 563.2283,437.1955,<br>311.2226,245.0812,<br>179.0347          | AM     | Astragaloside I                     | Saponins   |
| 142* | 20.99       | C <sub>12</sub> H <sub>16</sub> O <sub>2</sub>  | +H            | 193.1224        | -2.59          | 175.1126,147.1175,<br>137.0607,119.0860,<br>105.0707,91.0545               | -H            | 191.1072        | 0.00           | 189.0914,171.1024,<br>161.0244,116.9279                       | AS     | Senkyunolide A                      | Phthalides |
| 143  | 21.05       | C <sub>20</sub> H <sub>18</sub> O <sub>6</sub>  | +H            | 355.1186        | 1.13           | 335.2192,193.1227,<br>175.1124,137.0604                                    | -H            | 353.1024        | -0.28          | 311.2224,293.2107,<br>269.1642,116.9278                       | EB     | Desmethylanhydroi<br>caritin        | Flavonoids |
| 144  | 21.15       | C <sub>26</sub> H <sub>32</sub> O <sub>7</sub>  | +H            | 457.2222        | -0.87          | 398.2415,385.1275,<br>337.2356,315.0856,                                   | -H            | 455.2071        | 0.22           | 439.1760,425.1963,<br>383.1130,313.2384,                      | SF     | Kurarinol or isomer                 | Flavonoids |



| NO.  | RT<br>(min) | Formula                                         | Positive mode |                 |                |                                                                                     | Negative mode |                 |                |                                                                            | Origin       | Identitfcation                    | Type             |
|------|-------------|-------------------------------------------------|---------------|-----------------|----------------|-------------------------------------------------------------------------------------|---------------|-----------------|----------------|----------------------------------------------------------------------------|--------------|-----------------------------------|------------------|
|      |             |                                                 | Add<br>ucts   | Observed<br>m/z | Error<br>(ppm) | MS <sup>n</sup>                                                                     | Adducts       | Observed<br>m/z | Error<br>(ppm) | MS <sup>n</sup>                                                            |              |                                   |                  |
| 145  | 21.15       | C <sub>18</sub> H <sub>34</sub> O <sub>2</sub>  | +Na           | 337.2354        | -0.30          | 165.0169<br>279.2313,249.1960,<br>207.1015,191.1071,<br>123.0539                    | -H            | 313.2383        | 1.28           | 177.0183,161.0242<br>265.1468,203.0704,<br>161.0241,116.9282               | AS/AM        | Octadecanedioic<br>acid or isomer | Organic<br>acids |
| 146  | 21.20       | C <sub>25</sub> H <sub>30</sub> O <sub>6</sub>  | +H            | 427.2113        | -1.87          | 409.1998,376.2596,<br>337.2346,297.0750,<br>179.0349,165.0182                       | -H            | 425.1962        | -0.47          | 411.1801,383.1124,<br>313.2377,279.1599,<br>177.0194,161.0243,<br>116.9285 | SF           | Kushenol T                        | Flavonoids       |
| 147  | 21.25       | C <sub>45</sub> H <sub>72</sub> O <sub>16</sub> | +Na           | 891.4706        | -1.35          | 869.4871,671.4147,<br>437.3412,367.2092,<br>335.2191,317.1359,<br>217.0711,145.1019 | +HCOO         | 913.4793        | -0.44          | 867.4739,467.1701,<br>311.2219,297.0771,<br>190.9986,116.9279              | AM           | Isoastragaloside I                | Saponins         |
| 148* | 21.29       | C <sub>12</sub> H <sub>14</sub> O <sub>2</sub>  | +H            | 191.1070        | -1.05          | 173.0970,145.1019,<br>117.1169                                                      | -             | -               | -              | -                                                                          | AS           | Butylphthalide                    | Phthalides       |
| 149  | 21.39       | C <sub>18</sub> H <sub>34</sub> O <sub>4</sub>  | +Na           | 337.2359        | 1.19           | 279.2318,249.1960,<br>207.1014,189.0907,<br>123.0545                                | -H            | 313.2382        | 0.96           | 265.1465,205.0866,<br>161.0241,116.9280                                    | IS/AM/A<br>S | Octadecanedioic<br>acid or isomer | Organic<br>acids |
| 150  | 21.39       | -                                               | +Na           | 757.3982        | -              | 467.1953,337.2359,<br>297.1527,179.0344                                             | +HCOO         | 779.4064        | -              | 455.2070,313.2382                                                          | IS           | Unknown                           | Unknown          |
| 151  | 21.53       | C <sub>27</sub> H <sub>32</sub> O <sub>6</sub>  | +Na           | 475.2087        | -2.10          | 453.2256,437.1936,<br>303.1592,179.0339                                             | -H            | 451.2116        | -1.11          | 435.1451,409.1642,<br>299.1289,161.0239,<br>148.0181,116.9289              | SF           | 2'-<br>methoxykurarinone          | Flavonoids       |
| 152  | 21.59       | C <sub>18</sub> H <sub>34</sub> O <sub>6</sub>  | +Na           | 337.2354        | -0.30          | 279.2320,249.1967,                                                                  | -H            | 313.2379        | 0.00           | 265.1468,203.0695,                                                         | IS/AM/A      | Octadecanedioic                   | Organic          |

| NO.  | RT<br>(min) | Formula                                         | Positive mode |                 |                |                                                                                     | Negative mode |                 |                |                                                                                                  | Origin            | Identitfcation                    | Type             |        |
|------|-------------|-------------------------------------------------|---------------|-----------------|----------------|-------------------------------------------------------------------------------------|---------------|-----------------|----------------|--------------------------------------------------------------------------------------------------|-------------------|-----------------------------------|------------------|--------|
|      |             |                                                 | Add<br>ucts   | Observed<br>m/z | Error<br>(ppm) | MS <sup>n</sup>                                                                     | Adducts       | Observed<br>m/z | Error<br>(ppm) | MS <sup>n</sup>                                                                                  |                   |                                   |                  |        |
|      |             |                                                 |               |                 |                | 207.1018,191.1074,<br>123.0558                                                      |               |                 |                |                                                                                                  | 161.0242,116.9279 | S                                 | acid or isomer   | acids  |
| 153* | 21.63       | C <sub>30</sub> H <sub>50</sub> O <sub>5</sub>  | +Na           | 513.3527        | -5.65          | 419.2047,333.2881,<br>189.1362,119.1329                                             | -             | -               | -              | -                                                                                                |                   | AM                                | Cycloastragenol  | Others |
| 154  | 21.71       | C <sub>25</sub> H <sub>28</sub> O <sub>6</sub>  | +H            | 425.1957        | -1.65          | 407.1862,383.1562,<br>369.1342,289.1440,<br>165.0190                                | -H            | 423.1808        | 0.00           | 405.1696,387.1291,<br>261.1494,191.0553,<br>161.0244,137.0237,<br>116.9278                       | SF                | Sophoraflavanone<br>G             | Flavonoids       |        |
| 155  | 21.80       | C <sub>18</sub> H <sub>34</sub> O <sub>9</sub>  | +Na           | 337.2356        | 0.30           | 279.2322,249.1964,<br>207.1015,189.0917,<br>123.0558                                | -H            | 313.2382        | 0.96           | 265.1464,201.1123,<br>161.0237,116.9277                                                          | IS/AM/A<br>S      | Octadecanedioic<br>acid or isomer | Organic<br>acids |        |
| 156  | 21.96       | C <sub>45</sub> H <sub>72</sub> O <sub>16</sub> | +Na           | 891.4708        | -1.12          | 644.3220,437.3475,<br>335.2195,305.1314,<br>191.1108,173.0977,<br>145.1020,117.0704 | +HCOO         | 913.4803        | 0.66           | 439.1753,409.1644,<br>395.1852,311.2214,<br>297.1127,219.0657,<br>116.9279                       | AM                | Isoastragaloside I                | Saponins         |        |
| 157  | 21.99       | C <sub>12</sub> H <sub>14</sub> O <sub>2</sub>  | +H            | 191.1069        | -1.57          | 173.0957,145.1011,<br>117.0698                                                      | -             | -               | -              |                                                                                                  | AS                | 3-butylphthalide                  | Phthalides       |        |
| 158  | 22.01       | C <sub>26</sub> H <sub>30</sub> O <sub>7</sub>  | +Na           | 477.1891        | 0.42           | 455.2080,437.1969,<br>335.2195,297.0751,<br>277.1798,179.0337                       | -H            | 453.1916        | 0.66           | 439.1763,421.1649,<br>369.1350,339.1233,<br>275.1652,219.0657,<br>177.0194,149.0235,<br>116.9281 | SF                | Kushenol N or<br>isomer           | Flavonoids       |        |

| NO.  | RT (min) | Formula                                        | Positive mode |              |             |                                                       | Negative mode |              |             |                                                       | Origin   | Identifcation                            | Type          |
|------|----------|------------------------------------------------|---------------|--------------|-------------|-------------------------------------------------------|---------------|--------------|-------------|-------------------------------------------------------|----------|------------------------------------------|---------------|
|      |          |                                                | Adducts       | Observed m/z | Error (ppm) | MS <sup>n</sup>                                       | Adducts       | Observed m/z | Error (ppm) | MS <sup>n</sup>                                       |          |                                          |               |
| 159* | 22.05    | C <sub>15</sub> H <sub>10</sub> O <sub>5</sub> | -             | -            | -           | -                                                     | -H            | 269.0452     | 0.74        | 241.0491,222.5054,116.9280                            | AM/AS/IS | Emodin                                   | Others        |
| 160  | 22.35    | C <sub>26</sub> H <sub>28</sub> O <sub>6</sub> | +Na           | 459.1789     | 1.09        | 437.1930,421.1994,339.2498,333.2021,249.1941,179.0324 | -H            | 435.1810     | 0.46        | 309.0761,189.0919,177.0181,161.0235,116.9279          | SF       | M3(anhydrokushenol N)                    | Flavonoids    |
| 161* | 22.49    | C <sub>12</sub> H <sub>14</sub> O <sub>2</sub> | +H            | 191.1069     | -1.57       | 173.0961,163.1115,155.0854,145.1012,117.0697,91.0541  | -             | -            | -           | -                                                     | AS       | Ligustilide                              | Phthalides    |
| 162* | 22.63    | C <sub>12</sub> H <sub>12</sub> O <sub>2</sub> | +H            | 189.0917     | 0.53        | 173.0971,155.1071,145.1020,117.0707,91.0548           | -H            | 187.0762     | 1.60        | 163.1123,145.0291,116.9278                            | AS       | Butylidene phthalide                     | Phthalides    |
| 163  | 22.91    | C <sub>21</sub> H <sub>22</sub> O <sub>5</sub> | +H            | 355.1546     | 0.28        | 299.0924,249.1967,191.1074,179.0350                   | -H            | 353.1395     | 1.70        | 293.2116,275.2013,177.0197,166.0256,116.9280          | SF       | Xanthohumol                              | Flavonoids    |
| 164  | 23.02    | C <sub>18</sub> H <sub>30</sub> O <sub>3</sub> | -             | -            | -           | -                                                     | -H            | 293.2122     | 1.71        | 275.2018,269.2130,219.0663,116.9285                   | IS/AM    | 9-Hydroxy-10,12,15-octadecatrienoic acid | Organic acids |
| 165  | 23.51    | C <sub>25</sub> H <sub>28</sub> O <sub>6</sub> | +H            | 425.1971     | 1.65        | 407.0827,391.2453,333.2035,191.1071                   | -H            | 423.1808     | 0.00        | 405.1676,295.2278,261.2280,248.9726,161.0244,116.9281 | SF       | Kushenol E                               | Flavonoids    |
| 166  | 23.60    | -                                              | +Na           | 627.3358     | -           | 419.1825,318.2400,                                    | +HCOO         | 649.3434     | -           | 603.3386,333.1707,                                    | AM/AS/   | Unknown                                  | Unknown       |

| NO.  | RT<br>(min) | Formula                                        | Positive mode |                 |                |                                                                | Negative mode |                 |                |                                                                                     | Origin | Identitfcation                      | Type       |
|------|-------------|------------------------------------------------|---------------|-----------------|----------------|----------------------------------------------------------------|---------------|-----------------|----------------|-------------------------------------------------------------------------------------|--------|-------------------------------------|------------|
|      |             |                                                | Add<br>ucts   | Observed<br>m/z | Error<br>(ppm) | MS <sup>n</sup>                                                | Adducts       | Observed<br>m/z | Error<br>(ppm) | MS <sup>n</sup>                                                                     |        |                                     |            |
| 167  | 23.82       | C <sub>26</sub> H <sub>30</sub> O <sub>6</sub> | +Na           | 461.1942        | 0.43           | 263.2368,191.1077                                              | -H            | 437.1962        | -0.46          | 265.1481                                                                            | SF     | Kurarinone or<br>isomer             | Flavonoids |
|      |             |                                                |               |                 |                | 439.2128,421.1991,<br>315.0859,297.0769,<br>179.0349           |               |                 |                | 423.1809,353.2112,<br>271.2277,161.0244,<br>116.9279                                |        |                                     |            |
| 168  | 24.11       | C <sub>24</sub> H <sub>28</sub> O <sub>4</sub> | +Na           | 403.1885        | 0.00           | 381.2059,363.1955,<br>335.2074,213.0892,                       | -H            | 379.1909        | 0.00           | 367.1178,353.2107,<br>295.2273,189.0917,<br>116.9283                                | AS     | Riligustilide/Angelici<br>de isomer | Phthalides |
|      |             |                                                |               |                 |                | 191.1068,173.0965,<br>145.1020                                 |               |                 |                |                                                                                     |        |                                     |            |
| 169* | 24.19       | C <sub>21</sub> H <sub>20</sub> O <sub>6</sub> | +H            | 369.1338        | 0.00           | 313.0709,265.0960,<br>249.1957,135.0441                        | -H            | 367.1186        | 1.09           | 311.1684,295.2271,<br>265.1469,203.0707,<br>116.9279                                | EB     | Icaritin                            | Flavonoids |
| 170  | 24.21       | C <sub>24</sub> H <sub>28</sub> O <sub>4</sub> | +Na           | 403.1879        | -1.49          | 335.2005,213.0893,<br>191.1070,173.0962,<br>145.1022           | -H            | 379.1919        | 2.64           | 367.1191,295.2277,<br>293.2115,265.1477,<br>189.0914,116.9284                       | AS     | Riligustilide/Angelici<br>de isomer | Phthalides |
|      |             |                                                |               |                 |                | 423.1805,355.1907,<br>489.2250,437.1613,                       |               |                 |                |                                                                                     |        |                                     |            |
| 171  | 24.34       | C <sub>30</sub> H <sub>36</sub> O <sub>7</sub> | +Na           | 531.2359        | 0.00           | 509.2527,475.2100,<br>453.2254,421.2013,<br>279.2305,179.0329  | -H            | 507.2374        | -1.77          | 329.2119,295.2277,<br>277.2169,248.9716,<br>177.0193,161.0251,<br>128.0108,116.9274 | SF     | Kushenol M                          | Flavonoids |
|      |             |                                                |               |                 |                | 367.1179,297.2426,<br>293.2106,269.2116,<br>189.0918,116.9281  |               |                 |                |                                                                                     |        |                                     |            |
| 172  | 24.52       | C <sub>24</sub> H <sub>28</sub> O <sub>4</sub> | 2M+<br>Na     | 783.3876        | 0.38           | 403.1891,381.2063,<br>363.1961,335.2024,<br>213.0900,191.1076, | -H            | 379.1912        | 0.79           | 367.1179,297.2426,<br>293.2106,269.2116,<br>189.0918,116.9281                       | AS     | Riligustilide/Angelici<br>de isomer | Phthalides |

| NO. | RT (min) | Formula                                        | Positive mode |              |             |                                                                                                                       | Negative mode |              |             |                                                                            | Origin          | Identitfcation                                      | Type             |
|-----|----------|------------------------------------------------|---------------|--------------|-------------|-----------------------------------------------------------------------------------------------------------------------|---------------|--------------|-------------|----------------------------------------------------------------------------|-----------------|-----------------------------------------------------|------------------|
|     |          |                                                | Adducts       | Observed m/z | Error (ppm) | MS <sup>n</sup>                                                                                                       | Adducts       | Observed m/z | Error (ppm) | MS <sup>n</sup>                                                            |                 |                                                     |                  |
| 173 | 24.67    | C <sub>24</sub> H <sub>28</sub> O <sub>4</sub> | +Na           | 403.1890     | 1.24        | 173.0968,145.1020<br>381.2035,379.1892,<br>363.1955,335.2024,<br>213.0895,191.1069,<br>173.0969                       | -H            | 379.1920     | 2.90        | 353.2122,293.2119,<br>265.1473,189.0921,<br>116.9278                       | AS              | Riligustilide/Angelici<br>de isomer                 | Phthalides       |
| 174 | 24.67    | C <sub>25</sub> H <sub>28</sub> O <sub>5</sub> | +H            | 409.2018     | 0.73        | 391.1909,335.2037,<br>317.2087,277.2171,<br>179.1418                                                                  | -H            | 407.1859     | 0.25        | 329.1387,293.2118,<br>261.1495,248.9724,<br>116.9283                       | SF              | Kushenol A                                          | Flavonoids       |
| 175 | 24.67    | C <sub>18</sub> H <sub>30</sub> O <sub>3</sub> | +Na           | 317.2101     | 2.52        | 277.2166,249.1965,<br>213.0893,211.0738,<br>191.1069,189.0916,<br>161.1321,123.0548,<br>105.0705,81.0705              | -H            | 293.2119     | 0.68        | 269.2118,265.1472,<br>255.2327,203.0705,<br>189.0916,183.0121,<br>116.9281 | AS/IS/A<br>M/EB | 13-oxo-9E,11E-<br>octadecatrienoic<br>acid          | Organic<br>acids |
| 176 | 24.74    | C <sub>18</sub> H <sub>30</sub> O <sub>3</sub> | +Na           | 317.2101     | 2.52        | 277.2170,249.1964,<br>213.0894,211.0735,<br>191.1072,189.0915,<br>171.0808,161.1332,<br>123.0556,105.0703,<br>81.0703 | -H            | 293.2117     | 0.00        | 277.1432,269.2117,<br>265.1472,255.2324,<br>189.0910,183.0112,<br>116.9278 | AS/IS/A<br>M/EB | 9-oxo-10E,12E-<br>octadecatrienoic<br>acid          | Organic<br>acids |
| 177 | 24.91    | C <sub>18</sub> H <sub>30</sub> O <sub>3</sub> | +Na           | 317.2100     | 2.21        | 277.2166,249.1974,<br>213.0890,211.0732,<br>191.1070,189.0913,<br>161.1335,151.1126,                                  | -H            | 293.2116     | -0.34       | 269.2117,265.1468,<br>255.2319,203.0710,<br>183.0106,152.9952,<br>116.9280 | IS/AS/A<br>M/EB | 9(10)-epoxy-<br>12Z,15Z-<br>octadecadienoic<br>acid | Organic<br>acids |

| NO.  | RT<br>(min) | Formula                                        | Positive mode |                 |                |                                                                                                             | Negative mode |                 |                |                                                               | Origin          | Identitfcation                                        | Type             |
|------|-------------|------------------------------------------------|---------------|-----------------|----------------|-------------------------------------------------------------------------------------------------------------|---------------|-----------------|----------------|---------------------------------------------------------------|-----------------|-------------------------------------------------------|------------------|
|      |             |                                                | Add<br>ucts   | Observed<br>m/z | Error<br>(ppm) | MS <sup>n</sup>                                                                                             | Adducts       | Observed<br>m/z | Error<br>(ppm) | MS <sup>n</sup>                                               |                 |                                                       |                  |
| 178  | 25.05       | C <sub>24</sub> H <sub>28</sub> O <sub>4</sub> | 2M+<br>Na     | 783.3854        | -2.43          | 123.0556,105.0701,<br>81.0705<br>403.1874,381.2053,<br>363.1950,335.2069,<br>213.0889,191.1068,<br>173.0963 | -H            | 379.1906        | -0.79          | 309.1730,297.2426,<br>189.0917,116.9280                       | AS              | Riligustilide/Angelici<br>de isomer                   | Phthalides       |
| 179  | 25.11       | C <sub>18</sub> H <sub>30</sub> O <sub>3</sub> | +Na           | 317.2108        | 4.73           | 277.2162,249.1977,<br>213.0884,203.1797,<br>191.1070,161.1329,<br>147.1173,123.0556,<br>105.0703,81.0705    | -H            | 293.2114        | -1.02          | 279.2317,265.1471,<br>255.2316,183.0112,<br>152.9950,116.9280 | AS/IS/A<br>M/EB | 13-hydroxy-<br>6Z,9Z,11E-<br>octadecatrienoic<br>acid | Organic<br>acids |
| 180  | 25.29       | C <sub>24</sub> H <sub>28</sub> O <sub>4</sub> | +Na           | 403.1883        | -0.50          | 381.2054,363.1932,<br>335.2032,213.0885,<br>191.1071,173.0963                                               | -H            | 379.1914        | 1.32           | 361.1659,297.2432,<br>152.9959,116.9282                       | AS              | Riligustilide/Angelici<br>de isomer                   | Phthalides       |
| 181  | 25.34       | C <sub>24</sub> H <sub>28</sub> O <sub>4</sub> | 2M+<br>Na     | 783.3860        | -1.66          | 403.1890,381.2058,<br>363.1950,335.2011,<br>213.0894,191.1068,<br>173.0964                                  | -H            | 379.1911        | 0.53           | 361.1655,309.1732,<br>297.2425,293.2109,<br>189.0914,116.9278 | AS              | Tokinolide B isomer                                   | Phthalides       |
| 182  | 25.57       | C <sub>24</sub> H <sub>28</sub> O <sub>4</sub> | 2M+<br>Na     | 783.3875        | 0.26           | 403.1886,381.2058,<br>363.1956,335.2011,<br>213.0888,191.1066,<br>173.0965                                  | -H            | 379.1903        | -1.58          | 353.2009,295.2280,<br>293.2102,189.0914,<br>116.9280          | AS              | Tokinolide B isomer                                   | Phthalides       |
| 183* | 25.82       | C <sub>24</sub> H <sub>28</sub> O <sub>4</sub> | 2M+           | 783.3873        | 0.00           | 403.1896,381.2079,                                                                                          | -H            | 379.1905        | -1.05          | 353.1996,317.1751,                                            | AS              | Tokinolide B                                          | Phthalides       |

| NO.  | RT<br>(min) | Formula                                        | Positive mode |                 |                |                                                                                                           | Negative mode |                 |                |                                                                                                                                 | Origin | Identitfcation               | Type             |
|------|-------------|------------------------------------------------|---------------|-----------------|----------------|-----------------------------------------------------------------------------------------------------------|---------------|-----------------|----------------|---------------------------------------------------------------------------------------------------------------------------------|--------|------------------------------|------------------|
|      |             |                                                | Adducts       | Observed<br>m/z | Error<br>(ppm) | MS <sup>n</sup>                                                                                           | Adducts       | Observed<br>m/z | Error<br>(ppm) | MS <sup>n</sup>                                                                                                                 |        |                              |                  |
|      |             |                                                | Na            |                 |                | 363.1957,335.2013,<br>307.1692,213.0900,<br>191.1094,173.0970,<br>145.1017,117.0707                       |               |                 |                | 295.2271,265.1470,<br>249.1850,189.0912,<br>116.9278                                                                            |        |                              |                  |
| 184  | 25.91       | C <sub>30</sub> H <sub>36</sub> O <sub>6</sub> | +H            | 493.2571        | -3.85          | 265.1894,249.1947,<br>179.0335                                                                            | -H            | 491.2429        | -1.02          | 451.1714,437.1595,<br>423.1804,355.1913,<br>329.2111,295.2275,<br>279.0064,248.9729,<br>205.0851,161.0237,<br>128.0099,116.9278 | SF     | Kushenol B                   | Flavonoids       |
| 185* | 26.10       | C <sub>24</sub> H <sub>28</sub> O <sub>4</sub> | 2M+<br>Na     | 783.3861        | -1.53          | 403.1908,381.2062,<br>363.1954,335.2003,<br>307.1691,213.0894,<br>191.1073,173.0969,<br>145.1018,117.0708 | -H            | 379.1899        | -2.64          | 403.1906,381.2065,<br>363.1954,353.2004,<br>353.1998,325.1839,<br>295.2272,265.1470,<br>189.0918,116.9281                       | AS     | Riligustilide/Angelici<br>de | Phthalides       |
| 186* | 26.19       | C <sub>24</sub> H <sub>28</sub> O <sub>4</sub> | 2M+<br>Na     | 783.3862        | -1.40          | 307.1690,213.0893,<br>191.1078,173.0966,<br>145.1021,117.0703                                             | -H            | 379.1897        | -3.16          | 353.1993,325.1839,<br>295.2271,293.1800,<br>269.2118,265.1471,<br>189.0911,116.9280                                             | AS     | Levistolide A                | Phthalides       |
| 187  | 26.31       | C <sub>18</sub> H <sub>36</sub> O <sub>3</sub> | -             | -               | -              | -                                                                                                         | -H            | 299.2594        | 2.67           | 265.1468,183.0111,<br>116.9282                                                                                                  | EA     | Hydroxystearic acid          | Organic<br>acids |
| 188  | 26.51       | C <sub>24</sub> H <sub>28</sub> O <sub>4</sub> | 2M+           | 783.3846        | -3.45          | 403.1885,381.2057,                                                                                        | -             | -               | -              | -                                                                                                                               | AS     | Levistolide A isomer         | Phthalides       |

| NO. | RT (min) | Formula                                        | Positive mode |              |             |                                                                                                  | Negative mode |              |             |                   | Origin | Identitfcation       | Type          |
|-----|----------|------------------------------------------------|---------------|--------------|-------------|--------------------------------------------------------------------------------------------------|---------------|--------------|-------------|-------------------|--------|----------------------|---------------|
|     |          |                                                | Adducts       | Observed m/z | Error (ppm) | MS <sup>n</sup>                                                                                  | Adducts       | Observed m/z | Error (ppm) | MS <sup>n</sup>   |        |                      |               |
|     |          |                                                | Na            |              |             | 307.1699,213.0894,<br>191.1069,173.0967<br>403.1900,381.2068,                                    |               |              |             |                   |        |                      |               |
| 189 | 26.68    | C <sub>24</sub> H <sub>28</sub> O <sub>4</sub> | 2M+<br>Na     | 783.3876     | 0.38        | 363.1944,307.1695,<br>213.0892,191.1074,<br>173.0968,145.1020                                    | -             | -            | -           | -                 | AS     | Levistolide A isomer | Phthalides    |
| 190 | 26.97    | C <sub>18</sub> H <sub>34</sub> O <sub>3</sub> | -             | -            | -           | -                                                                                                | -H            | 297.2428     | -0.67       | 269.2119,116.9281 | EA     | Ricinelaidic acid    | Organic acids |
|     |          |                                                |               |              |             | 381.2060,363.1935,<br>307.1699,213.0888,<br>191.1071,173.0964,<br>145.1018<br>403.1901,381.2072, |               |              |             |                   |        |                      |               |
| 191 | 26.92    | C <sub>24</sub> H <sub>28</sub> O <sub>4</sub> | +Na           | 403.1888     | 0.74        | 335.2022,307.1693,<br>213.0897,191.1073,<br>173.0967,145.1025<br>403.1894,381.2062,              | -             | -            | -           | -                 | AS     | Levistolide A isomer | Phthalides    |
|     |          |                                                |               |              |             | 335.2006,213.0891,<br>191.1069,173.0965,<br>145.1012<br>403.1898,381.2070,                       |               |              |             |                   |        |                      |               |
| 192 | 27.05    | C <sub>24</sub> H <sub>28</sub> O <sub>4</sub> | 2M+<br>Na     | 783.3876     | 0.38        | 363.1944,335.2008,<br>213.0894,191.1073,                                                         | -             | -            | -           | -                 | AS     | Levistolide A isomer | Phthalides    |
|     |          |                                                |               |              |             | 335.2006,213.0891,<br>191.1069,173.0965,<br>145.1012<br>403.1898,381.2070,                       |               |              |             |                   |        |                      |               |
| 193 | 27.15    | C <sub>24</sub> H <sub>28</sub> O <sub>4</sub> | 2M+<br>Na     | 783.3861     | -1.53       | 363.1944,335.2008,<br>213.0894,191.1073,                                                         | -             | -            | -           | -                 | AS     | Levistolide A isomer | Phthalides    |
|     |          |                                                |               |              |             | 335.2006,213.0891,<br>191.1069,173.0965,<br>145.1012<br>403.1898,381.2070,                       |               |              |             |                   |        |                      |               |
| 194 | 27.27    | C <sub>24</sub> H <sub>28</sub> O <sub>4</sub> | 2M+<br>Na     | 783.3864     | -1.15       | 363.1944,335.2008,<br>213.0894,191.1073,                                                         | -             | -            | -           | -                 | AS     | Levistolide A isomer | Phthalides    |



| NO.  | RT<br>(min) | Formula                                        | Positive mode |                 |                |                                                                                    | Negative mode |                 |                |                                | Origin          | Identifcation           | Type          |
|------|-------------|------------------------------------------------|---------------|-----------------|----------------|------------------------------------------------------------------------------------|---------------|-----------------|----------------|--------------------------------|-----------------|-------------------------|---------------|
|      |             |                                                | Adducts       | Observed<br>m/z | Error<br>(ppm) | MS <sup>n</sup>                                                                    | Adducts       | Observed<br>m/z | Error<br>(ppm) | MS <sup>n</sup>                |                 |                         |               |
| 195  | 27.35       | C <sub>24</sub> H <sub>28</sub> O <sub>4</sub> | 2M+<br>Na     | 783.3885        | 1.53           | 173.0966,145.1019<br>403.1896,381.2066,<br>213.0891,191.1070,<br>173.0965,145.1019 | -             | -               | -              | -                              | AS              | Levistolide A isomer    | Phthalides    |
| 196  | 27.50       | C <sub>24</sub> H <sub>28</sub> O <sub>4</sub> | 2M+<br>Na     | 783.3857        | -2.04          | 403.1900,381.2061,<br>363.1945,213.0893,<br>191.1071,173.0964,<br>145.1019         | -             | -               | -              | -                              | AS              | Levistolide A isomer    | Phthalides    |
| 197  | 27.70       | C <sub>24</sub> H <sub>28</sub> O <sub>4</sub> | 2M+<br>Na     | 783.3873        | 0.00           | 403.1894,381.2058,<br>363.1938,213.0893,<br>191.1066,145.1017                      | -             | -               | -              | -                              | AS              | Levistolide A isomer    | Phthalides    |
| 198* | 28.51       | C <sub>30</sub> H <sub>48</sub> O <sub>3</sub> | -             | -               | -              | -                                                                                  | -H            | 455.3519        | -1.32          | 271.2275,248.9726,<br>116.9282 | ZJ/IS           | Betulinic acid          | Organic acids |
| 199  | 28.83       | C <sub>16</sub> H <sub>30</sub> O <sub>2</sub> | -             | -               | -              | -                                                                                  | -H            | 253.2175        | 2.76           | 237.0761,183.0047,<br>116.9277 | EA/ZJ           | ethyl 9Z-tetradecenoate | Others        |
| 200* | 28.92       | C <sub>30</sub> H <sub>48</sub> O <sub>3</sub> | -             | -               | -              | -                                                                                  | -H            | 455.3522        | -0.66          | 283.0632,253.2159,<br>116.9276 | ZJ              | Oleanic acid            | Organic acids |
| 201  | 29.41       | C <sub>18</sub> H <sub>32</sub> O <sub>2</sub> | -             | -               | -              | -                                                                                  | -H            | 279.2332        | 2.86           | 265.1465,248.9714,<br>116.9276 | AS              | Linoleic acid           | Organic acids |
| 202  | 31.13       | C <sub>18</sub> H <sub>37</sub> NO             | +H            | 284.2958        | 1.76           | 230.1398,123.0560,<br>103.9561,88.0762                                             | -             | -               | -              | -                              | IS/EB.AS<br>/SF | Hexadecylacetamide      | Others        |

Note: RT: retention time, \*: the compound identified by a standard; IS (Xue Renshen): *Indigofera stachyoides* Lindl.; AM (Huang Qi): *Astragalus membranaceus* (Fisch.) Bge.var.*mongholicus* (Bge.) Hsiao; AS (Dang Gui): *Angelica sinensis* (Oliv.) Diels; EA (E Jiao): *Equus asinm* L.; ZJ (Da Zao): *Ziziphus jujuba* Mill.; SF (Ku Shen): *Sophora flavescens* Ait.; EB (Yin Yanghuo): *Epimedium brevicornu* Maxim.
