# Supplementary figures and images for: Combining multiple acquisition modes and computational data annotation for structural characterization in traditional Chinese medicine: Miao Nationality medicine Qijiao Shengbai Capsule as a case study
Source: Royal Society of Chemistry journal article supplement (doi:10.1039/d2ra04720a), 2022-01-01

**(A)**

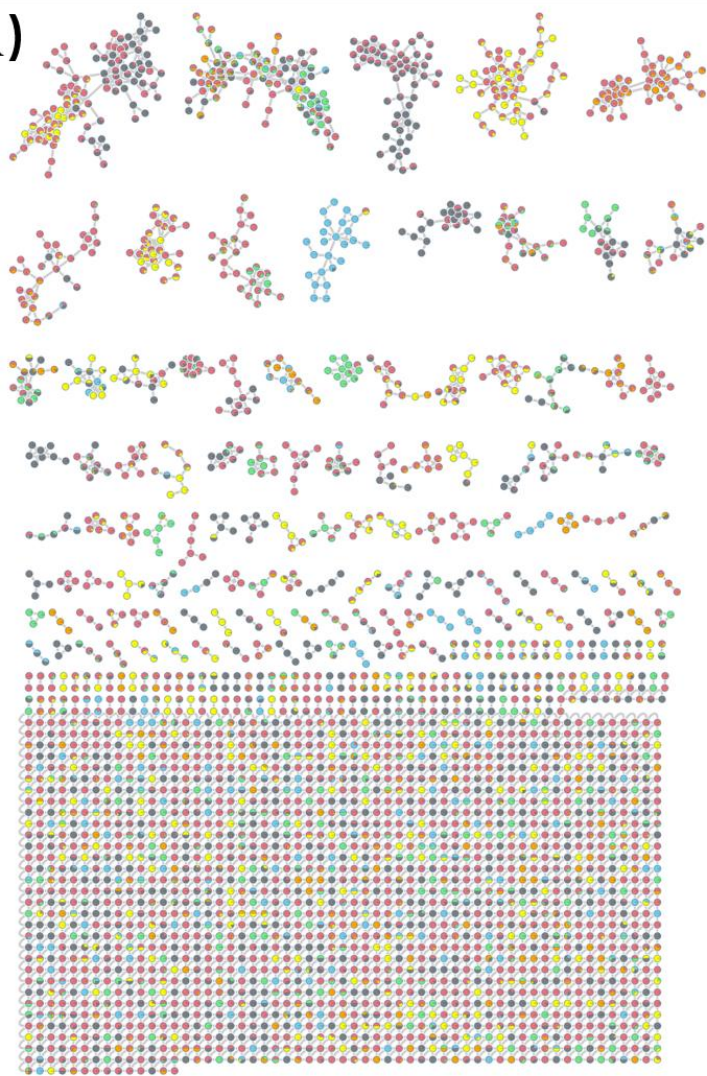

**(B)**

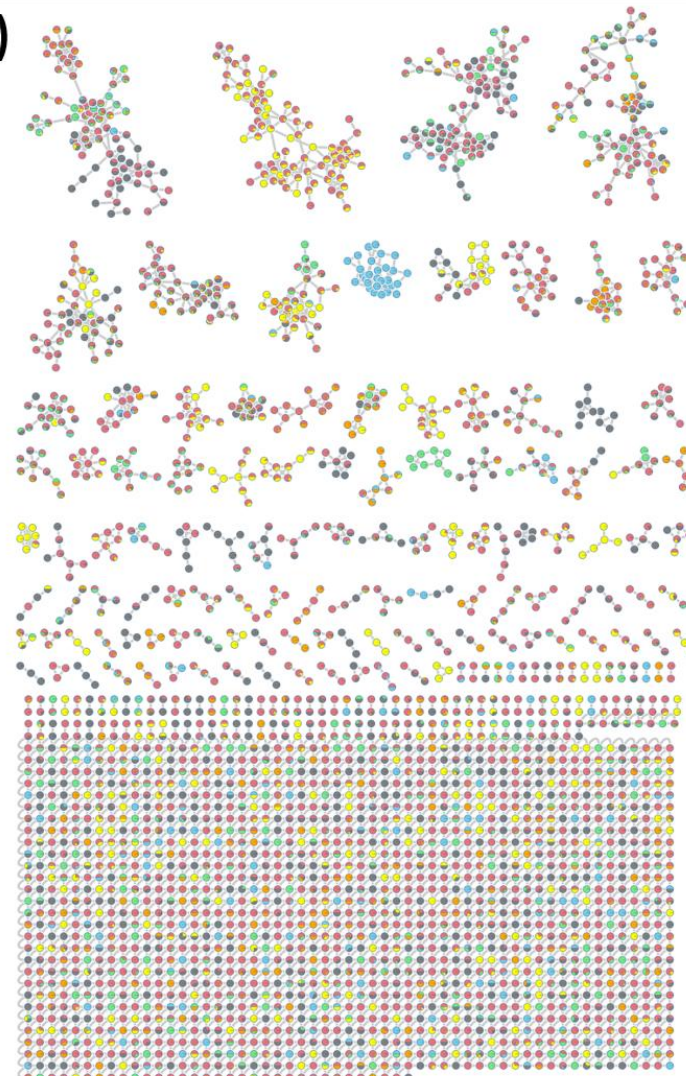

Supplement: d2ra04720a2.pdf [file d2ra04720a2.pdf]

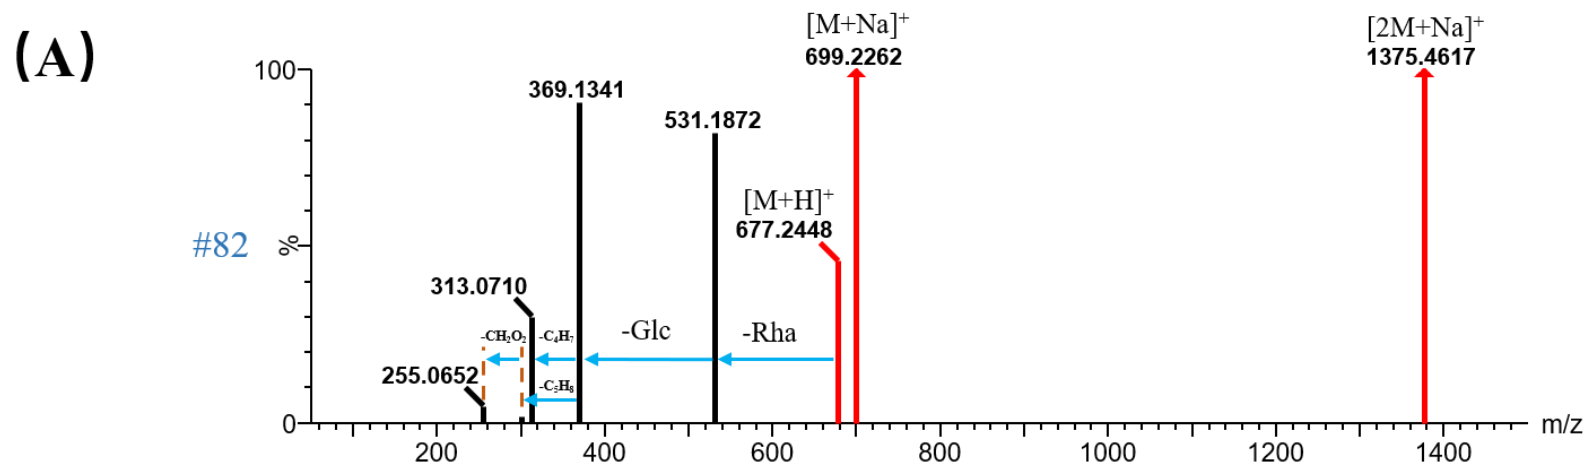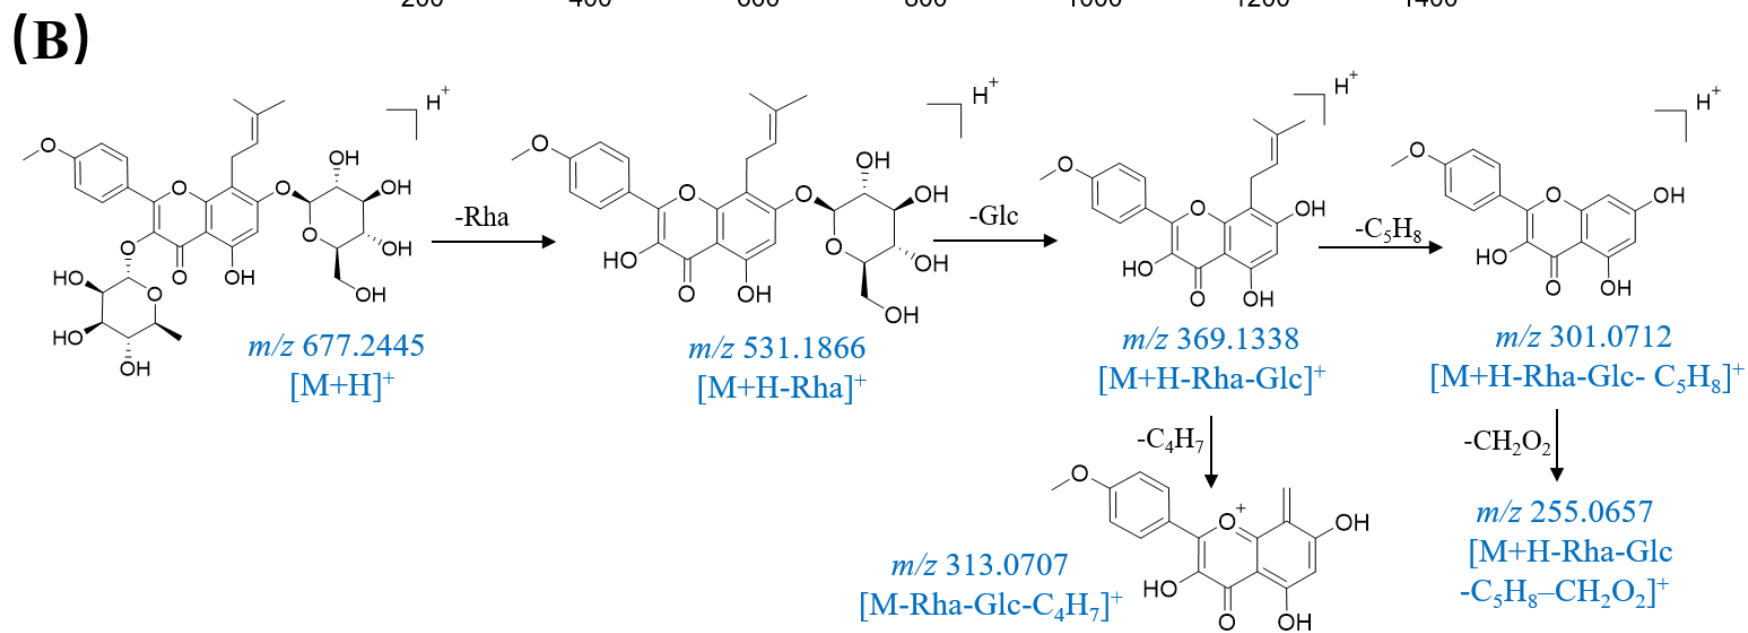

Supplement: d2ra04720a3.pdf [file d2ra04720a3.pdf]

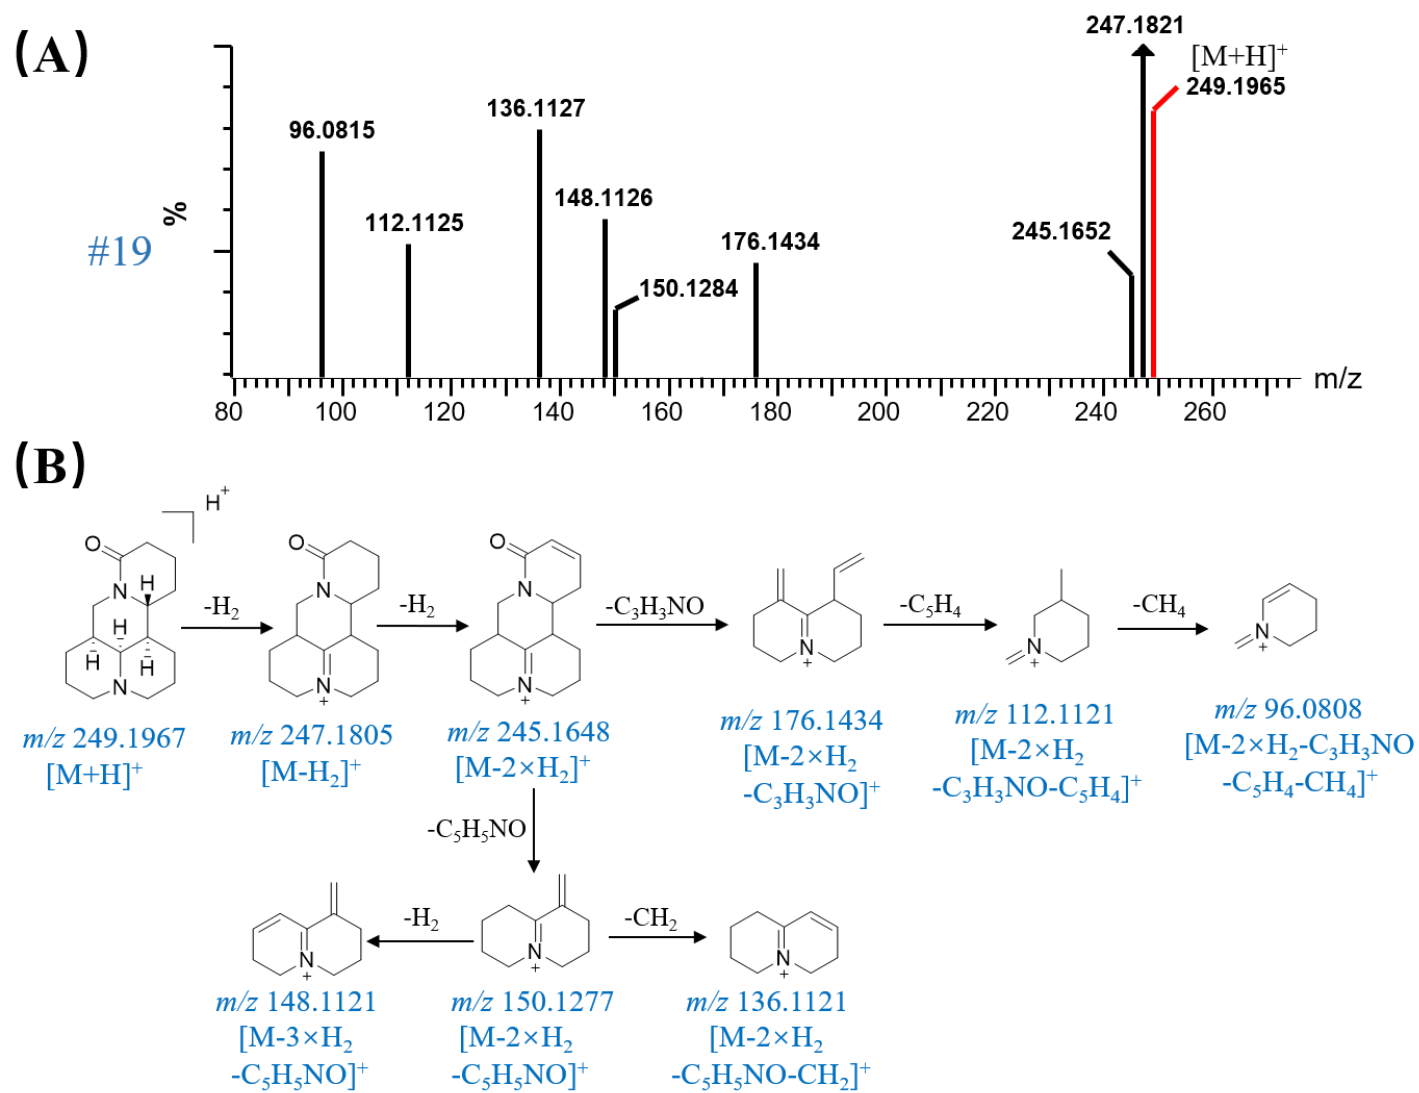

Supplement: d2ra04720a4.pdf [file d2ra04720a4.pdf]

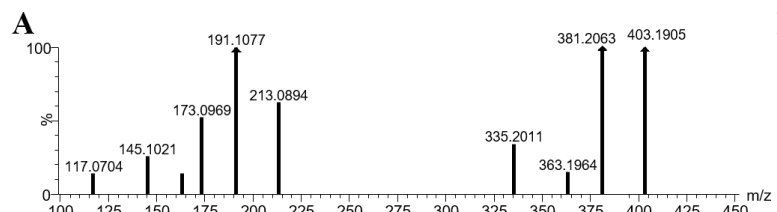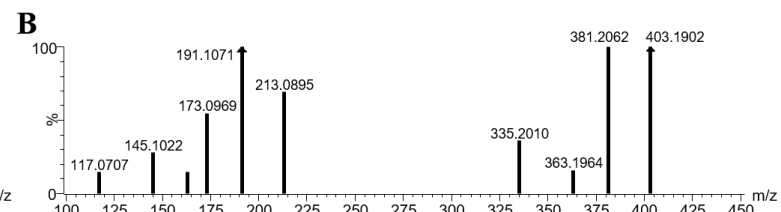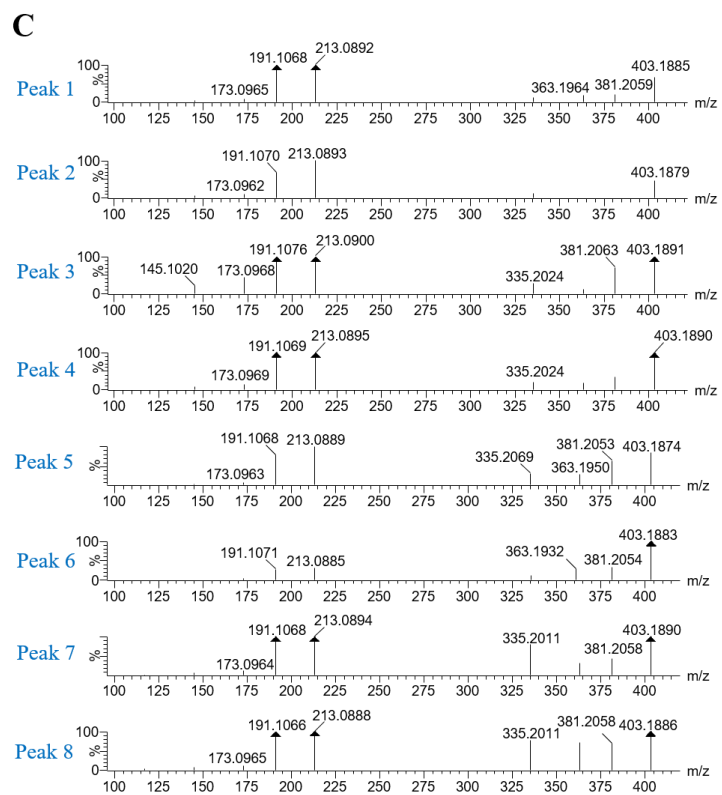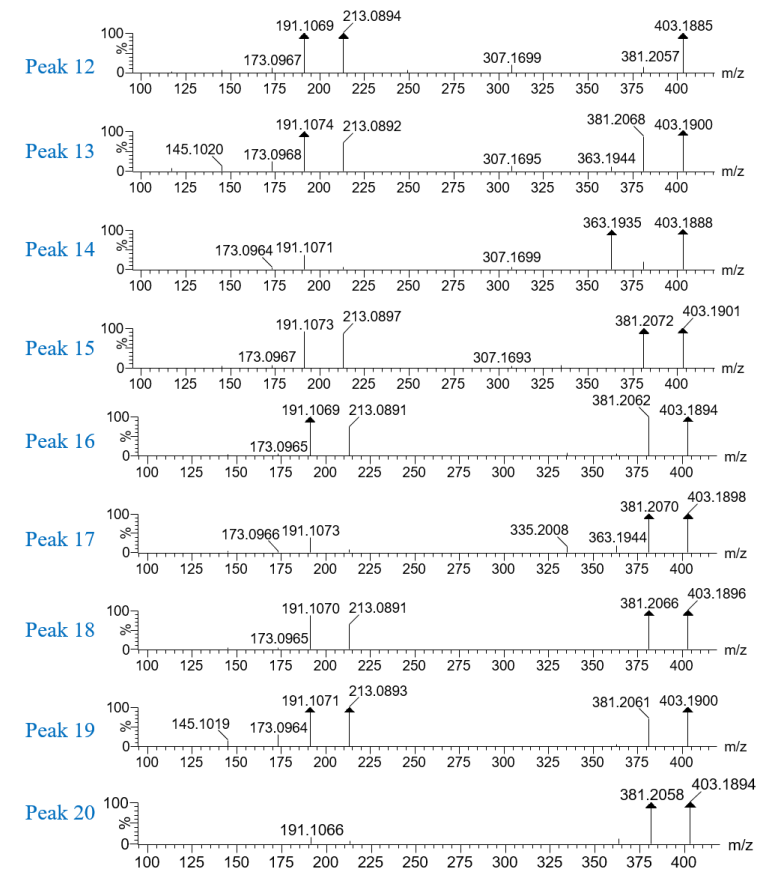

Supplement: d2ra04720a6.pdf [file d2ra04720a6.pdf]
